# Supplementary material for: Re-evaluation of the traditional diet-heart hypothesis: analysis of recovered data from Minnesota Coronary Experiment (1968-73)
Source: PubMed Central journal article supplement — BMJ. 2016 Apr 12;353:i1246. doi: 10.1136/bmj.i1246 (PMC4836695; doi:10.1136/bmj.i1246), 2016-04-12
Supplement: ramc027623.ww1_default.pdf [file ramc027623.ww1_default.pdf]

**Appendix: Supplementary material [posted as supplied by author]**

**Part 1: MCE supporting materials and historical context**

**Tribute to Dr. Ivan Frantz in leading the Minnesota Coronary Experiment team**

**Reared on Margarine and to the Tune of Spinning Ultracentrifuges:**

**A Son's Recollections of Ivan D. Frantz, Jr. During the Early Days of Lipid Research**

**Robert P. Frantz, M.D.**

As the youngest son of Ivan and Veronica Frantz, I was born in Minneapolis, MN in 1958 at the University of Minnesota Hospitals. My father spent long days in his laboratory at the Variety Club Heart Hospital on East River Road. In the evening he would sit at the dining room table, a yellow pad in front of him, armed with a pencil, an eraser and sharpener, and an array of papers and files. He hand wrote his drafts, and as he did, the entire table would jostle. He had impeccable cursive, having won awards in school for his penmanship. On weekends he would take me down to the laboratory, pushing back a heavy wooden door with his name on it, revealing an exciting world filled with the sound of spinning ultracentrifuges. He showed me the miracle of separating lipid fractions with Percoll gradients, and the evolving techniques of electrophoresis. On crisp autumn Saturdays we would stop in before the Minnesota Gopher football game, and if we were lucky he would make a stellar New England clam chowder in a beaker over a Bunsen burner.

My father was a brilliant, yet humble man. His goal was to do the best science possible, and to promote public health through efforts to develop sufficient understanding of factors driving cardiovascular disease to permit informed intervention. He did not seek the spotlight. In the early days of lipid research, computers were in their infancy. As computing evolved and became an important tool for research, he taught himself computer languages, including Fortran and Cobol. He rarely took vacation, and when he did always brought along things to work on.

As I reflect on the evolution of thought regarding diet and cardiovascular risk, and having sifted through thousands of files from my father's basement that pertained to his passionate pursuit of lipid research, I think about what my father would have thought of the additional analyses so painstakingly conducted by Dr. Chris Ramsden and colleagues and reported in the accompanying manuscript.

In the first paragraph of a short paper published in *Atherosclerosis* in 1977 regarding treatment of hyperlipidemia, my father sounded a cautionary note: "Several of the more effective methods of treating hyperlipidemias were discovered by accident. In some cases the mode of action remains unknown. As

long as this state of ignorance persists, one must harbor some misgivings that, despite a satisfying fall in blood lipid concentrations, the treatment may be doing more harm than good <sup>1</sup>.” In that paper, he closed by noting the remarkable Japanese fishermen who had a lifelong diet low in cholesterol and saturated fat, and wondering whether that lifelong approach was likely to be greater than what could be achieved by dietary modifications later in life.

He performed small crossover studies of the effects of various diets on lipid lowering in healthy college students, trying to understand whether the partially hydrogenated soybean oil favored by food manufacturers was as effective as corn or unhydrogenated soy oil in lipid lowering. The partially hydrogenated oil did lower cholesterol, but not as much as the other oils, and had less effect on triglycerides <sup>2</sup>.

The campaign to undertake large clinical trials of dietary modification took many years to come to fruition. It was necessary to convince those responsible for public health that such trials were not only worth the expense, but also feasible. Therefore my father undertook preliminary studies to prove feasibility <sup>3</sup>. The Minnesota Coronary Survey thus was many years in the making, from its roots in epidemiology of cardiovascular disease, to development of analytical techniques capable of measuring lipid levels reproducibly, to designing the clinical trials and convincing the necessary policy stewards and funding agencies that such trials could and should be carried out. Completing the MCS was an enormous effort on the part of many individuals, including the subjects who agreed to participate. My father would praise the whole team for their efforts in making the work possible. The entire lipid research team at the U of M was passionate about what they were trying to accomplish. Accordingly the disappointment when the overall study results were negative must have been profound. My father officially had retired from the U of M in 1984, though it was hard to see any major difference in his work ethic as an Emeritus Professor in the years after that, culminating in the publication of the MCS study results in 1989 when he was 74 years old.

If he were alive today, I know my father would have been delighted that the data he had devoted his career to making possible had been painstakingly revisited in order to shed additional light on the frustratingly paradoxical results. Science is a never ending search for the truth, including the need to revise hypotheses, to explain unexpected results, and to apply that knowledge for the betterment of the human race.

**Table A. Full cohort and pre-specified subgroups of the Minnesota Coronary Experiment**

| (Sub)groups                                                            | Key Considerations                                                                                                                                                                                                                                                                                                                            |
|------------------------------------------------------------------------|-----------------------------------------------------------------------------------------------------------------------------------------------------------------------------------------------------------------------------------------------------------------------------------------------------------------------------------------------|
| Full cohort                                                            | With >9,400 participants, the full MCE population was easily the largest randomized controlled diet-heart trial testing whether replacement of SFA with vegetable oil rich in LA reduced the risk of CHD and death.                                                                                                                           |
| Women                                                                  | The MCE is the only diet-heart trial to evaluate clinical effects in women after random assignment to either serum cholesterol lowering diet or control diet. Since CHD manifests later in women than men, the expanded age range of the MCE population was considered a unique opportunity to assess clinical efficacy of the diet in women. |
| Men                                                                    | Men were considered a subgroup likely to establish benefit of the serum cholesterol lowering diet, due to higher incidence of CHD than women.                                                                                                                                                                                                 |
| ≥ age 65                                                               | The MCE is the larger of only two RCTs testing the clinical effects of a serum cholesterol-lowering diet in individuals older than 65. Analyses of this high-risk subgroup were planned but not reported.                                                                                                                                     |
| < age 65                                                               | Participants <65 were considered a population that was likely to see benefit from the serum cholesterol lowering diet.                                                                                                                                                                                                                        |
| Primary prevention<br>(No EKG evidence of prior myocardial infarction) | The majority of MCE participants (about 95%) did not have EKG evidence of a current or prior myocardial infarction (no pathological Q wave) at randomization.                                                                                                                                                                                 |
| Secondary prevention<br>(EKG evidence of prior myocardial infarction)  | In the grant proposal, MCE investigators reported that the presence of a pathological Q wave on EKG upon entry into the pre-randomization observational phase was associated with an increased risk of a subsequent event by a factor of 2.6 <sup>4</sup> . Analyses of this high-risk subgroup were planned but not reported.                |
| Participants consuming study diets for ≥1 year                         | MCE investigators hypothesized that the effects of the serum cholesterol lowering diet would take substantial time to manifest. A special emphasis was placed on participants who were exposed to study diets for ≥ 1 year, in terms of serum cholesterol measurements, sample size calculations, and subgroup analyses <sup>4-6</sup> .      |
| Autopsy cohort                                                         | MCE investigators hypothesized that participants randomized to the serum cholesterol lowering diet would have less advanced coronary, aortic and cerebrovascular atherosclerosis and fewer myocardial infarcts and strokes at autopsy.                                                                                                        |

Table references<sup>4-12</sup>. Abbreviations: CHD, coronary heart disease; EKG, electrocardiogram.

## Recovery and validation of MCE data and study materials

We recovered raw data from the Minnesota Coronary Experiment (MCE) stored on two 9-track magnetic tapes ('tape 2' and 'tape 4') (see **fig A** below), using similar methods as we previously employed to recover missing Sydney Diet Heart Study (see the web appendix of <sup>13</sup>). Technical expertise in data recovery and conversion was provided by John Svee (Data Conversion Resource, Inc., Aurora, Colorado, USA). Computer Logics software was used to read the raw tape to disk via a pertec interface with 9-track equipment attached to Windows 98 boxes in pure DOS mode. Tape 2 contained data written to tape on the 327<sup>th</sup> day of 1988. The raw MCE 'tape 2' data was split into 2 logical files with standard zero-length separation blocks between files. These data were stored on the tape in fixed length American Standard Code for Information Interchange (ASCII) text files. Tape 4 contained data written to tape on the 183<sup>rd</sup> day of 1985. We determined that it was written using Kronos operating system, version 53. This Kronos data was found to be expressed in 6-bit, rather than standard 8-bit characters. The data format and the exact character conversion table code (Table B-2 on page 106 from <sup>14</sup>) were identified and translated by trial and error, ultimately resulting in readable ASCII characters which were found to represent a related series of punched cards. Each "record" of punched card data ended in a series of ":" characters. These were translated from the original varying number of colon characters per line into PC record marks (character 13 + character 10). Next these punch card records were programmatically assembled into fixed length ASCII text records. This file of 57,664 records was split into three files representing Type D sub-records (MCE data collection form 011, see Appendix Section VI.), Type R sub-records (MCE form 02) and Type X sub-records (MCE forms 02/11).

In addition to the tape processing, Data Conversion Resource was used to post-process the results of numerous scanned data summary tables on green-bar paper. This process took the scanned documents translated via OCR and corrected for various OCR errors such as numeral "5" resulting as "S" and so forth. These fully converted and corrected documents were triple-verified to ensure accuracy of character recognition. For further validation, each of the recovered MCE datasets were compared to each other and to data reported in the 1989 study publication <sup>8</sup>, the 1981 Master's Thesis <sup>9</sup>, and the 1975 conference proceedings <sup>10-12</sup>, as well as numerous other recovered MCE documents and data sources. After validation, data elements from all sources were merged into a master file in a format suitable for statistical analysis.

Paper autopsy files were recovered for 149 of the 295 MCE participants who underwent autopsy. Each manila autopsy file folder contained completed carbon copies of MCE data forms 08 (Coronary Artery Atherosclerosis), 09 (Classification of Myocardial Infarcts), and 10 (Classification of Aorta), but did not contain missing data for Atherosclerosis of Brain (Form 12) or Circle of Willis (Form 13). Recovered autopsy data were entered into spreadsheets matching the MCE study forms in a blinded manner, and triple-verified for accuracy.

We also recovered an extensive collection of FORTRAN coding sheets authored by Dr. Ivan Frantz, which outlined the analysis plans for autopsy materials and other aspects of the study. Autopsy-related coding sheets included the original, extensive plans for analyses of myocardial infarcts, coronary atherosclerosis, aortic atherosclerosis, and cerebrovascular atherosclerosis, arteriosclerosis and infarcts according to treatment group, and stratified by gender, age and time on study diets.

We also found evidence that all autopsy-related data was stored on a 9-track magnetic tape (Tape #380, written on 12/12/1974) entitled 'Autopsy-stones'. Despite an extensive search, we have not yet been able to recover this tape.

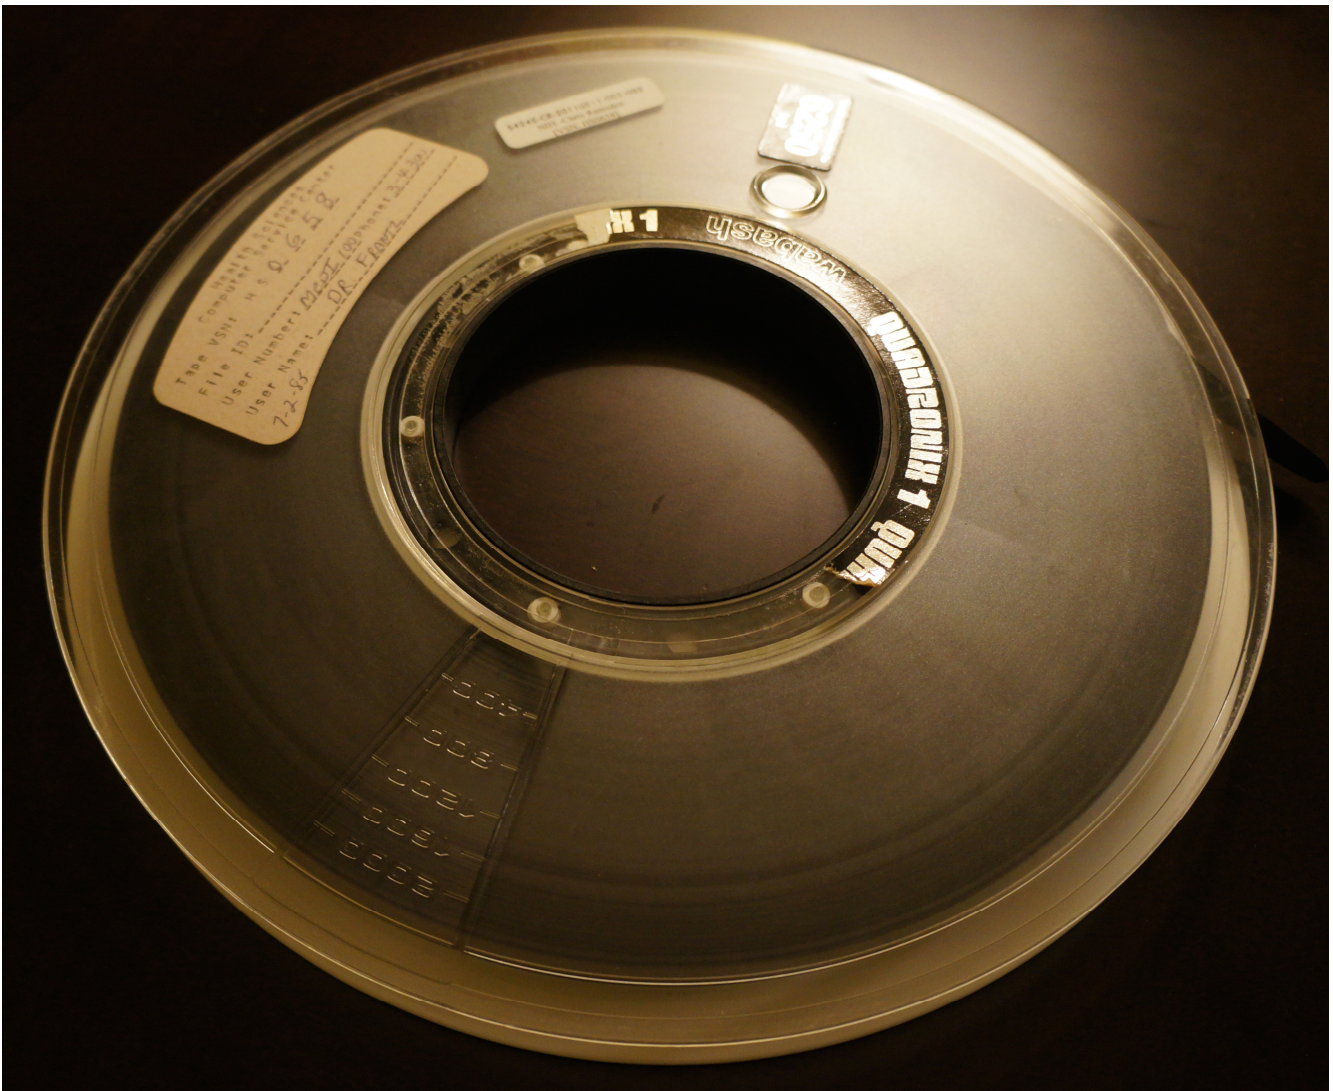

fig A: Recovered 9-track magnetic “tape 4” with MCE data

**Table B. Intervention start dates and diet duration in the seven MCE hospitals**

| <b>Hospital</b>             | <b>Observational<br/>Start date</b> | <b>Observational<br/>Duration<br/>(months)</b> | <b>Diet start date</b> | <b>Diet duration<br/>(months)</b> |
|-----------------------------|-------------------------------------|------------------------------------------------|------------------------|-----------------------------------|
| Willmar                     | 9/1/1966                            | 24                                             | 11/6/1968              | 56                                |
| Hastings                    | 9/1/1966                            | 26                                             | 1/14/1969              | 54                                |
| Fergus Falls                | 9/1/1966                            | 27                                             | 2/11/1969              | 53                                |
| St. Peter                   | 9/1/1966                            | 31                                             | 5/15/1969              | 49                                |
| Oak Terrace<br>Nursing Home | 2/1966                              | 40                                             | 6/2/1969               | 49                                |
| Moose Lake                  | 9/1/1966                            | 37                                             | 10/1/1969              | 45                                |
| Anoka                       | 9/1/1966                            | 42                                             | 2/16/1970              | 41                                |

### Chemical compositions of the intervention and control diets in the seven MCE hospitals

*All samples included*

#### CHEMICAL ANALYSIS OF THREE WEEK FOOD COLLECTION -- CONTROL AND TREATMENT DIETS

MAY 12, 1977 - JUNE 1, 1977

|              |           | TOT CAL | PROT GMS | FAT GMS | %CAL | CHO GMS | CHOL MGMS | POLY % | %CAL  | SAT % | %CAL  | MONO % | %CAL  | OTHER % | %CAL | TOT FA % | P:S   |      |
|--------------|-----------|---------|----------|---------|------|---------|-----------|--------|-------|-------|-------|--------|-------|---------|------|----------|-------|------|
| ANOKA        | CONTROL   | 2688    | 93.9     | 116.9   | 39.2 | 314.9   | 458       | 17.8   | 7.00  | 40.5  | 15.84 | 41.5   | 16.28 | .2      | .07  | 100.5    | 39.36 | .55  |
| ANOKA        | TREATMENT | 2792    | 95.4     | 129.1   | 41.6 | 312.2   | 150       | 44.1   | 18.33 | 19.3  | 8.03  | 36.5   | 15.18 | .0      | .02  | 99.8     | 41.46 | 2.29 |
| FERGUS FALLS | CONTROL   | 2292    | 101.9    | 106.7   | 41.8 | 231.0   | 560       | 10.1   | 4.14  | 52.0  | 21.75 | 37.0   | 15.49 | .9      | .39  | 100.3    | 41.88 | .20  |
| FERGUS FALLS | TREATMENT | 2162    | 99.6     | 99.3    | 41.3 | 217.5   | 195       | 36.1   | 14.95 | 26.8  | 11.06 | 36.9   | 15.21 | .2      | .09  | 100.0    | 41.31 | 1.35 |
| HASTINGS     | CONTROL   | 2244    | 75.4     | 103.3   | 41.4 | 253.2   | 402       | 11.9   | 4.93  | 50.7  | 20.98 | 36.8   | 15.23 | .7      | .27  | 99.7     | 41.27 | .23  |
| HASTINGS     | TREATMENT | 2247    | 76.3     | 99.5    | 39.8 | 261.4   | 111       | 42.1   | 16.79 | 21.4  | 8.53  | 36.1   | 14.38 | .4      | .15  | 100.0    | 39.85 | 1.97 |
| MOOSE LAKE   | CONTROL   | 2307    | 85.2     | 85.4    | 33.4 | 299.5   | 421       | 13.3   | 4.41  | 46.2  | 15.52 | 39.3   | 13.09 | 1.2     | .39  | 100.1    | 33.45 | .29  |
| MOOSE LAKE   | TREATMENT | 2490    | 87.0     | 98.1    | 35.5 | 314.6   | 158       | 36.0   | 12.76 | 25.5  | 9.06  | 38.3   | 13.58 | .2      | .06  | 100.0    | 35.47 | 1.43 |
| OAK TERRACE  | CONTROL   | 2000    | 78.6     | 79.6    | 35.6 | 242.4   | 460       | 11.7   | 4.16  | 49.0  | 17.36 | 39.1   | 14.02 | .3      | .09  | 100.0    | 35.62 | .24  |
| OAK TERRACE  | TREATMENT | 2097    | 81.9     | 90.2    | 38.7 | 239.4   | 151       | 32.5   | 12.58 | 27.0  | 10.48 | 40.3   | 15.58 | .2      | .06  | 100.0    | 38.70 | 1.29 |
| ST. PETER    | CONTROL   | 2338    | 88.8     | 110.4   | 42.5 | 247.1   | 487       | 20.6   | 8.71  | 41.4  | 17.72 | 37.8   | 15.99 | .3      | .11  | 100.0    | 42.53 | .62  |
| ST. PETER    | TREATMENT | 2377    | 87.6     | 112.8   | 42.7 | 252.7   | 236       | 32.8   | 14.00 | 28.7  | 12.29 | 38.3   | 16.37 | .2      | .08  | 100.0    | 42.73 | 1.41 |
| WILLMAR      | CONTROL   | 2473    | 91.2     | 112.6   | 41.0 | 273.7   | 389       | 16.8   | 6.87  | 43.7  | 18.00 | 38.6   | 15.76 | .9      | .36  | 100.0    | 40.99 | .40  |
| WILLMAR      | TREATMENT | 2432    | 90.8     | 108.4   | 40.1 | 273.4   | 278       | 37.8   | 15.20 | 26.7  | 10.71 | 35.3   | 14.12 | .2      | .07  | 99.9     | 40.05 | 1.42 |

Cal=calories; GMS=grams; %CAL= percentage of food energy; MGMS=milligrams; CHO= carbohydrates; CHOL=dietary cholesterol; POLY=polyunsaturated fatty acids; SAT=saturated fatty acids; MONO=monounsaturated fatty acids; TOT FA=total fatty acids; P:S=polyunsaturated to saturated fatty acid ratio.

**Table C: Classification of fatal and non-fatal events in the MCE**

| <b>Event code</b> | <b>Diagnostic category</b>                 |
|-------------------|--------------------------------------------|
| 01                | Acute myocardial infarction, autopsied     |
| 02                | Acute myocardial infarction, not autopsied |
| 03                | Sudden cardiac death (cardiac arrest)      |
| 04                | CHD death (other)                          |
| 05                | Acute myocardial infarction, non-fatal     |
| 06                | Acute stroke, non-fatal                    |
| 07                | Acute CHD illness, non-fatal               |
| 08                | Silent myocardial infarction (EKG only)    |
| 09                | All other deaths                           |
| 10                | Stroke, fatal                              |

*Ascertainment and coding of fatal and non-fatal events*

Fatal and non-fatal events were assigned specific International classification of diseases codes <sup>5</sup> by the PI under masked conditions based on evaluation of hospital chart and autopsy findings and, when necessary, consultation with the attending physician. Each event was later assigned to one of ten categories of MCE coded events (**table C**). To ensure masking was not compromised by the anticipated between-group differences in follow-up serum cholesterol, the PI did not have access to serum cholesterol measures <sup>7</sup>.

The MCE team also paid close attention to the overall death rate in both groups since “atherosclerosis may contribute to many deaths in which no actual fresh myocardial infarct or coronary occlusion has occurred” <sup>7</sup>, and “deaths attributed to pneumonia or other causes could be related ultimately to coronary events” <sup>7</sup>.



**Table D: Important MCE data that remain missing**

| Unanswered Questions                                                                                                                                                          | MCE Hypotheses                                                                                                                              | Data reported                                                                                    | Missing data                                                                                                                   | Why these data are important                                                                                                                                                                                                                                                                                                                            |
|-------------------------------------------------------------------------------------------------------------------------------------------------------------------------------|---------------------------------------------------------------------------------------------------------------------------------------------|--------------------------------------------------------------------------------------------------|--------------------------------------------------------------------------------------------------------------------------------|---------------------------------------------------------------------------------------------------------------------------------------------------------------------------------------------------------------------------------------------------------------------------------------------------------------------------------------------------------|
| <b>Full cohort and pre-specified subpopulations</b>                                                                                                                           |                                                                                                                                             |                                                                                                  |                                                                                                                                |                                                                                                                                                                                                                                                                                                                                                         |
| Did the serum cholesterol lowering diet alter risk for CHD events and deaths in patients with pre-existing CHD (secondary prevention)?                                        | The diet is likely to be protective in this high-risk population                                                                            | 392 randomized subjects had a pathological Q wave on initial EKG                                 | CVD events and deaths were not reported for this high-risk population                                                          | This MCE subgroup is the second largest secondary prevention RCT cohort with provision of LA-rich vegetable oil in place of SFA (without co-provision of EPA+DHA). The Sydney Diet Heart Study (n=458) is the largest such cohort.                                                                                                                      |
| Did the serum cholesterol lowering diet alter risk for CHD events and deaths in participants 65 years of age and older?                                                       | Effects in older adults are unknown. "Even a clear negative result in older subjects would be of great practical significance" <sup>7</sup> | Life table analysis <sup>9</sup> shows substantial increased risk of death (without statistics). | CVD events were not reported. It is not clear if the increased risk of death in treatment group was statistically significant. | The MCE is the larger of only two RCT to test whether replacing SFA with vegetable oil rich in LA alters the risk of CHD and death in older adults.                                                                                                                                                                                                     |
| <b>Associations between changes in serum cholesterol and CVD events and deaths</b>                                                                                            |                                                                                                                                             |                                                                                                  |                                                                                                                                |                                                                                                                                                                                                                                                                                                                                                         |
| Was the degree of serum cholesterol lowering related to risk of CHD events and CHD deaths?                                                                                    | The degree of serum cholesterol lowering is likely to be inversely associated with risk of CHD events                                       | No data reported. We recovered all serum cholesterol data.                                       | CHD and CVD events for all subjects with serum cholesterol data                                                                | The MCE is the largest RCT to test whether the serum cholesterol lowering effects of replacing SFA with vegetable oil rich in LA alters the risk of CHD.                                                                                                                                                                                                |
| <b>Post-mortem analyses</b>                                                                                                                                                   |                                                                                                                                             |                                                                                                  |                                                                                                                                |                                                                                                                                                                                                                                                                                                                                                         |
| Did the serum cholesterol-lowering diet reduce the progression of atherosclerosis in the Circle of Willis (brain) or the risk of stroke?                                      | The diet is likely to reduce strokes and atherosclerotic progression                                                                        | No data reported                                                                                 | Postmortem cerebrovascular atherosclerosis and infarct data for all 295 autopsies (Tape #380, 12/12/1974)                      | Only postmortem human data looking at the role of diet-induced serum cholesterol lowering, or of increasing LA in place of SFA, on cerebral atherosclerosis or ischemic stroke.                                                                                                                                                                         |
| Did the serum cholesterol-lowering diet reduce the progression of aortic or coronary atherosclerosis or myocardial infarction?                                                | The diet is likely to reduce myocardial infarcts and atherosclerotic progression                                                            | Recovered aortic and coronary atherosclerosis data and myocardial infarct data for 149 subjects  | Postmortem coronary, aortic atherosclerosis and myocardial infarct data for 146 of 295 completed autopsies (MCE Tape #380)     | Only postmortem human data looking at the role of diet-induced cholesterol lowering, or of increasing LA in place of SFA, on aortic or coronary atherosclerosis or myocardial infarcts (MI). Analysis of recovered data (partial dataset) found more MI, and a signal toward increased coronary atherosclerosis in the cholesterol lowering diet group. |
| <b>New hypotheses to explain unfavorable study results</b>                                                                                                                    |                                                                                                                                             |                                                                                                  |                                                                                                                                |                                                                                                                                                                                                                                                                                                                                                         |
| Did the serum cholesterol-lowering diet have adverse effects in subpopulations known to have increased linoleic acid oxidation (eg, alcoholics, heavy smokers, older adults)? | Hypothesis proposed to help explain unfavorable results of the Sydney Diet Heart Study <sup>13</sup>                                        | No data reported                                                                                 | Smoking status, alcoholic diagnosis and other diagnostic coding                                                                | In the Sydney Diet Heart Study, there was significant effect modification by drinking status; heavy drinkers (HR 2.89; p=0.03) and smokers (HR 2.09; p=0.03) who were randomized to the high LA intervention fared poorly <sup>13</sup>                                                                                                                 |

**Table E: Serum cholesterol lowering according to diet adherence in the MCE**

| <b>Meals<br/>attended</b> | <b>Intervention</b> |              |             | <b>Control</b> |             |             | <b>Combined groups</b> |             |             |
|---------------------------|---------------------|--------------|-------------|----------------|-------------|-------------|------------------------|-------------|-------------|
|                           | n                   | mean         | sd          | n              | mean        | sd          | n                      | mean        | sd          |
| >98%                      | 390                 | -18.0        | 10.7        | 379            | -2.8        | 13.6        | 769                    | -10.5       | 14.4        |
| >90-98%                   | 433                 | -14.3        | 12.8        | 451            | -1.0        | 14.7        | 884                    | -7.5        | 15.3        |
| >70-90%                   | 258                 | -10.7        | 12.5        | 238            | 0.6         | 15.8        | 496                    | -5.2        | 15.3        |
| ≤70%                      | 98                  | -2.9         | 15.4        | 108            | 1.6         | 13.3        | 206                    | -0.6        | 14.5        |
| <b>Total</b>              | <b>1179</b>         | <b>-13.8</b> | <b>13.0</b> | <b>1176</b>    | <b>-1.0</b> | <b>14.5</b> | <b>2355</b>            | <b>-7.4</b> | <b>15.2</b> |

Data are from the ≥1 year serum cholesterol cohort. Values are for average change in serum cholesterol from baseline.

**Table F: Characteristics of the MCE autopsy cohort (n=149)**

|                                | Intervention |    | Control     |    | t-Test  |
|--------------------------------|--------------|----|-------------|----|---------|
|                                | Mean (SD)    | n  | Mean (SD)   | n  | p-value |
| Age at randomization, years    | 71.1 (11.9)  | 76 | 67.8 (14.1) | 73 | 0.127   |
| Systolic blood pressure, mmHg  | 127 (22.9)   | 75 | 128 (19.8)  | 68 | 0.829   |
| Diastolic blood pressure, mmHg | 77 (13.4)    | 75 | 75.1 (11.5) | 68 | 0.363   |
| Serum Cholesterol, mg/dL       | 214 (50)     | 69 | 206 (65)    | 62 | 0.403   |
| Serum Triglycerides, mg/dL     | 109 (39.7)   | 69 | 113 (70.5)  | 62 | 0.699   |
| BMI                            | 23.6 (4.5)   | 69 | 23.2 (3.6)  | 61 | 0.617   |
| Diet exposure in days          | 345 (272)    | 76 | 352 (312)   | 73 | 0.886   |
| % Missed meals†                | 3.4 (5.4)    | 69 | 3.7 (7.0)   | 62 | 0.788   |
| % Male                         | 60.5 (49.2)  | 76 | 68.5 (46.8) | 73 | 0.313   |

†Average percentage of missed meals throughout the full study period

**Table G: Association between serum cholesterol and risk of infarct and atherosclerosis in the MCE autopsy cohort**

|                                | Intervention |       |               |         | Control |       |               |         | Both Groups |       |               |         |
|--------------------------------|--------------|-------|---------------|---------|---------|-------|---------------|---------|-------------|-------|---------------|---------|
|                                | n            | Coef† | 95% CI        | p-value | n       | Coef† | 95% CI        | p-value | n           | Coef† | 95% CI        | p-value |
| Coronary atherosclerosis score | 64           | -1.75 | (-3.88, 0.38) | 0.09    | 59      | -0.24 | (-2.27, 1.80) | 0.78    | 123         | -0.51 | (-1.89, 0.87) | 0.40    |
| Aortic atherosclerosis score   | 61           | 0.10  | (-0.23, 0.43) | 0.49    | 56      | -0.12 | (-0.49, 0.26) | 0.47    | 117         | -0.02 | (-0.33, 0.28) | 0.85    |
|                                | n            | OR‡   | 95% CI        | p-value | n       | OR‡   | 95% CI        | p-value | n           | OR‡   | 95% CI        | p-value |
| Myocardial infarcts            | 65           | 0.98  | (0.56, 1.72)  | 0.96    | 59      | 1.02  | (0.52, 1.99)  | 0.95    | 124         | 1.19  | (0.84, 1.69)  | 0.34    |

†Coefficients are change in atherosclerosis score for each 30 mg/dL *decrease* in average serum cholesterol. Based on linear regressions for atherosclerosis score as a function of average follow-up serum cholesterol, adjusted for baseline serum cholesterol, age, BMI, gender, adherence to the diet, and systolic blood pressure, and clustering within hospital.

‡ Odds ratio for each 30 mg/dL *decrease* in average serum cholesterol. Based on logistic regressions for having at least one infarct as a function of average follow-up serum cholesterol, adjusted for baseline serum cholesterol, age, BMI, gender, adherence to the diet, and systolic blood pressure.

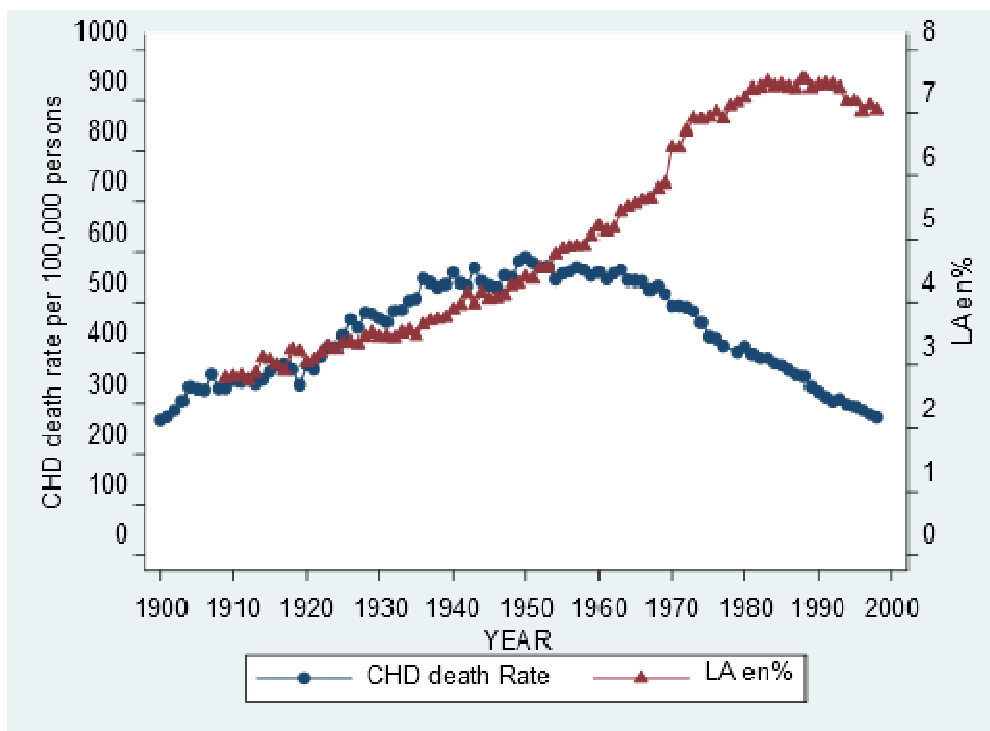

**Fig B: Ecological association between change in LA and CHD mortality in the United States in the 20<sup>th</sup> century**

*Ecological associations between LA and CHD mortality are subject to many important confounders. Notable confounders in the 1909-1960 interval include diagnostic bias due to increasing availability of electrocardiograms, increased health care access, and growing appreciation for the presence of coronary heart disease. Notable confounders in the 1960–2000 interval include public health initiatives (eg, major declines in smoking & secondhand smoke exposure, widespread access to defibrillators and ambulances), and major advances in medications (eg, aspirin, antihypertensives, statins) and surgical treatments (e.g., coronary artery bypass graft, angioplasty).*

†Mean annual LA intakes are estimated from USDA economic disappearance data and expressed as a percentage of food energy<sup>15</sup>; ‡CHD mortality data downloaded from<sup>16</sup>.

Abbreviations: CHD, coronary heart disease; LA, linoleic acid; en%, percentage of energy from foods.

Ecological associations between LA intake and CHD mortality have been cited as support for the diet-heart hypothesis<sup>17</sup>. However, these associations are subject to many important confounders and wholly dependent on the timeframe selected (**fig B**). For example, the steep rise in per capita LA intake between 1909 and 1960 in the United States was accompanied by a steep rise in CHD mortality. By contrast, the comparatively modest increase in dietary LA between 1960 and 2000 coincided with a steep decline in CHD mortality. Drawing a causal inference from this latter interval requires disregarding both the rise in CHD, and many potential dominant confounders (see legend of **fig B**). It is also notable that the majority of the increase in per capita LA intake in the United States occurred before 1961, when serum cholesterol lowering dietary advice was initiated.

**Table H: Linoleic acid contents of nuts, seeds, and vegetable oils**

| <b>Whole food or extracted oil</b> | <b>LA content<br/>(g/100g)</b> |
|------------------------------------|--------------------------------|
| Corn                               | 0.5                            |
| Corn Oil                           | 53.5                           |
| Soybeans                           | 10.8                           |
| Soybean Oil                        | 51.0                           |
| Sunflower Seeds                    | 23.1                           |
| Sunflower Oil†                     | 65.7                           |
| Cottonseed Oil                     | 51.5                           |
| Canola Oil                         | 19.0                           |
| Almonds                            | 12.3                           |
| Pecans                             | 20.6                           |

LA, linoleic acid. Fatty acid contents of oils vary to some extent by season, latitude, and other conditions. USDA National Nutrient Database numbers: corn 11167, corn oil 04518, soybeans 16111, soybean oil 04044, sunflower seeds 12036, sunflower oil 04506, cottonseed oil 04502, canola oil 04582, almonds 12061, pecans 12142<sup>18</sup>. †Varieties of sunflower oil with lower LA content are commercially available.

## Part 2

### Systematic review & meta-analysis of RCTs that replaced SFA with LA rich vegetable oil

#### Effects of Replacing Saturated Fat with Vegetable Oils Rich in Linoleic Acid on Coronary Heart Disease Mortality: A Systematic Review and Meta-Analysis of Randomized Controlled Trials

##### ABSTRACT

###### Background

A key component of dietary guidelines has long been to replace saturated fat (SFA) with vegetable oils (e.g., corn oil, safflower oil, soybean oil) that are rich in linoleic acid (LA). This advice is based on the traditional diet-heart hypothesis prediction that replacement of SFA with LA decreases coronary heart disease (CHD) and all-cause mortality by reducing serum LDL and total cholesterol.

###### Objective

To conduct a systematic review and meta-analysis of randomized controlled trials (RCTs) that specifically tested whether replacement of SFA with LA-rich vegetable oil decreases CHD mortality and all-cause mortality.

###### Methods

Studies published in English from 1950 to Sept. 2015 were identified through systematic searches of PubMed, EMBASE, and CINAHL, hand-searching of related publications, grey literature sources, and contact with study investigators and family members of deceased investigators to identify potentially unpublished trials and endpoints. Studies were included if they randomly assigned individual participants to a diet intervention that provided vegetable oil rich in linoleic acid in place of saturated fat compared to a usual care control diet, reported deaths from CHD or all-causes, and were not confounded by unequal intensity of major concomitant dietary or medical interventions. Study quality and bias assessment included the following: random sequence generation; adequacy of allocation concealment; adequacy of blinding of participants and personnel; adequacy of blinding of outcome assessments; selective reporting; systematic differences in between-group care; and study-specific sources of potential bias. All review stages were conducted independently by two investigators. Pooled hazard ratios (HR) were calculated using inverse-variance weighted random-effects meta-analysis.

###### Results

Of 1270 publications initially identified, only five RCTs were included in the main analysis representing 10,808 participants, 324 deaths attributed to CHD, and 1,001 deaths from all-causes. The mean change in serum cholesterol in the course of these trials ranged from 7.8 to 13.8% lower in the intervention vs. control groups. In meta-analyses, these cholesterol-lowering interventions showed no evidence of benefit on CHD mortality (HR 1.13; 95% CI 0.83, 1.54) or all-cause mortality (HR 1.07; 95% CI 0.90, 1.27). There was evidence of statistical heterogeneity in both magnitude and direction of effect for the CHD mortality ( $I^2$ : 45.1%;  $\text{Tau}^2$ : 0.0534) and all-cause mortality ( $I^2$ : 38.8%;  $\text{Tau}^2$ : 0.0132). In sensitivity analyses including additional 3 RCTs that were confounded by provision of n-3 EPA+DHA and other major diet changes, and/or relied on advice only (with modest diet changes) null results were noted for both CHD mortality (HR 1.00; 95% CI 0.81, 1.24;  $I^2$ : 37.5%;) and all-cause mortality (HR 1.00; 95% CI 0.87, 1.15;  $I^2$ : 34%). Reasons for heterogeneity of the pooled HR among the eight studies were explored; neither the dose of LA nor differences in between-group cholesterol lowering helped explain the heterogeneity.

###### Conclusions

Available RCT evidence demonstrates that replacement of SFA with LA-rich vegetable oil effectively lowers serum cholesterol, but does not support the hypothesis that this translates to lower risk of death from CHD or all-causes.

## INTRODUCTION

The traditional diet-heart hypothesis predicts that replacing dietary SFA with vegetable oils rich in LA will reduce CHD events and deaths by lowering serum cholesterol. Advice to replace SFA with LA-rich vegetable oils (e.g., corn oil, sunflower oil, safflower oil, cottonseed oil, or soybean oil) has been a cornerstone of dietary guidelines for the past half-century (**see main paper, Figure 10**). However, the lack of supporting RCT evidence for such advice has been a source of controversy.<sup>13, 19</sup> Several diet-heart meta-analyses have been published, but they have not specifically examined the effects of replacing SFA with LA-rich vegetable oils. For example, a meta-analysis by Hooper et al<sup>20</sup> included RCTs that lowered SFA but did not distinguish between trials that replaced SFA with LA-rich oils, from those that replaced total and saturated fat with carbohydrates, and also included RCTs that markedly increased dietary EPA+DHA alongside LA. Similarly, Mozaffarian et al<sup>21</sup> included RCTs that markedly increased dietary EPA+DHA from seafood and cod liver oil, among other diet changes (e.g. sugar restriction, increase in fiber). EPA and DHA are not present in vegetable oils and are reported to influence CHD pathogenesis by mechanisms independent of cholesterol lowering. Therefore, it is not clear whether the results of previous meta-analyses are driven by 1) reductions in SFA, 2) replacement of SFA with LA-rich vegetable oil, 3) or to increases in EPA+DHA. The objective of this systematic review and meta-analysis is to determine whether RCTs that *specifically* replaced SFA with LA-rich vegetable oil(s) provide evidence to support the traditional diet-heart hypothesis.

## METHODS

We followed the PRISMA ([www.prisma-statement.org](http://www.prisma-statement.org)) guidelines<sup>22</sup> throughout the design, implementation, analysis, and reporting of this systematic review and meta-analysis.

### Data sources

A protocol for this systematic review and meta-analysis has not been registered. A search was conducted using three major databases: the National Library of Medicine's PubMed, EMBASE, and CINAHL. We used search terms utilized by other investigators (2010) (**table I**).<sup>21</sup> Published meta-analyses and reviews were examined for additional peer-reviewed articles not discovered through database searches.<sup>19-21</sup> The search strategy focused on retrieval of articles from the peer-reviewed medical literature, reference lists of systematic reviews, meta-analyses, individual trials, grey literature sources, and, based on our previous work, also included extensive contact with study investigators and family members of deceased investigators to identify unpublished data.



**Table I. PubMed Search Terms, 25 September 2015**

("Fatty Acids, Omega-6"[Mesh] OR "unsaturated fatty acid"[tiab] OR "unsaturated fatty acids"[tiab] OR "unsaturated fat"[tiab] OR "unsaturated fats"[tiab] OR "polyunsaturated fatty acid"[tiab] OR "polyunsaturated fatty acids"[tiab] OR "polyunsaturated fat"[tiab] OR "polyunsaturated fats"[tiab] OR "omega-6"[tiab] OR "linoleic"[tiab] OR "octadecadienoic acid"[tiab] OR "safflower oil"[tiab] OR "sesame oil"[tiab] OR "soybean oil"[tiab] OR "soyabean oil"[tiab] OR "corn oil"[tiab]) AND ("cardiovascular diseases"[Mesh] OR "cardiovascular disease"[tiab] OR "cardiovascular diseases"[tiab] OR "heart disease"[tiab] OR "heart diseases"[tiab] OR "myocardial infarction"[tiab] OR "myocardial infarctions"[tiab] OR "heart attack"[tiab] OR "heart attacks"[tiab] OR "sudden death"[tiab] OR "sudden deaths"[tiab] OR "coronary syndrome"[tiab]) NOT ("Case Reports"[Publication Type] OR "stroke"[tiab] OR "strokes"[tiab] OR "cerebrovascular accident"[tiab] OR "cerebrovascular accidents"[tiab] OR "Fatty Acids, Omega-3"[Mesh] OR "omega-3"[tw] OR "n-3"[tw]) AND ((Clinical Trial[ptyp] OR Meta-Analysis[ptyp] OR Randomized Controlled Trial[ptyp]) AND "humans"[MeSH Terms] AND "adult"[MeSH Terms])

### **Study selection and data extraction**

Included in the main analysis were all serum cholesterol-lowering RCTs with a publication in English that (a) randomly assigned individual participants, (b) provided an LA-rich vegetable oil intervention in place of SFA, compared to a usual care control diet, (c) were not confounded by the addition of large quantities of n-3 EPA and DHA or by other major concomitant interventions (e.g., complex diet pattern changes) or unequal intensity of medical management (e.g., smoking cessation advice or blood pressure control), and (d) reported deaths due to CHD or all causes. Hence, RCTs that provided large quantities of n-3 EPA and DHA, or provided advice only without provision of LA rich oils were excluded from the main analysis, as were studies with only biochemical or intermediate endpoints. Sensitivity analyses included diet-heart RCTs that also provided large quantities of n-3 EPA and DHA or provided advice only without provision of an LA-rich study oil, but otherwise met the inclusion and exclusion criteria for the main analysis.

All review stages were conducted independently by two investigators. Studies were screened based on an inspection of their titles and/or abstracts. Methods papers were carefully examined to determine key elements of the dietary interventions. Duplicate publications and abstracts from the same study were reviewed to examine consistency and to glean additional information about design and study outcomes but were otherwise not considered. Reviews and commentaries were not considered. Studies with a primary focus on medication evaluation were also excluded.

Data extracted from the studies included the number of trial participants in the experimental and control diets as well as deaths from coronary heart disease (CHD) and all causes by intervention group. Also extracted were hazard ratios where available along with the maximum follow-up time for each study. Additionally included were the fatty acid composition of the study oils and other aspects of the study

diets. The change in total cholesterol by group assignment was calculated for each study. Also noted was whether the sample populations were institutionalized or free living and whether the study target was secondary prevention of CHD (e.g., population recruited from post-infarction population) or a population with and without CHD at baseline.

### **Bias Assessment**

Risk of bias was assessed for individual studies and included the following study characteristics: 1) random sequence generation; 2) allocation concealment; 3) blinding of participants and personnel; 4) blinding of outcome assessments; 5) selective reporting; 6) systematic differences in between-group medical care; and 7) study-specific sources of potential bias. Two investigators rated the risk of bias independently and resolved any discrepancies with discussion.

### **Statistical Analysis**

We calculated pooled risk estimates (hazard ratios with 95% confidence intervals and p-values) for CHD death and all-cause mortality for the five RCTs that met inclusion criteria (main analysis) and again including Oslo Diet Heart Study, the St. Thomas Atherosclerosis Regression Study, and the Diet and Re-infarction Trial in sensitivity analysis. When hazard ratios were not available, they were estimated by calculating risk ratios. Results of random effects models are reported using the DerSimonian and Laird inverse-variance weighting method<sup>23</sup>. Between-study heterogeneity was assessed with the  $I^2$  statistic along with an estimate of between-study variance (Tau-squared) and stratification by study oil. Publication bias was assessed by visual inspection of a funnel plot of the treatment effect versus standard error. Because there was some evidence of imbalance in the funnel plot, in a sensitivity analyses, estimates were examined using a trim and fill procedure and excluding the small Rose Corn Oil Trial. Potential sources of heterogeneity were explored using stratified fixed effects meta-analysis (for type of PUFAs) and inverse variance weighted meta-regressions (for between-group cholesterol reduction and increases in dietary linoleic acid).

Statistical analyses were performed using Stata version 13.1 (Stata Corporation, College Station, TX, 2009) with a two-tailed alpha set at 0.05.

## Results

The searches returned a total of 1260 articles, 301 of which were duplicate articles or additional articles on the same study (**fig C 3**). Ten additional articles were identified through review articles. Most screened studies were excluded because they were supplement-only studies, they were drug interventions, or they only reported biochemical endpoints. Others were observational studies, commentaries, genetic studies, trial design studies, studies to develop dietary measures, or compliance reports. Particular attention was given to the 60 studies reporting dietary interventions (**table J**).

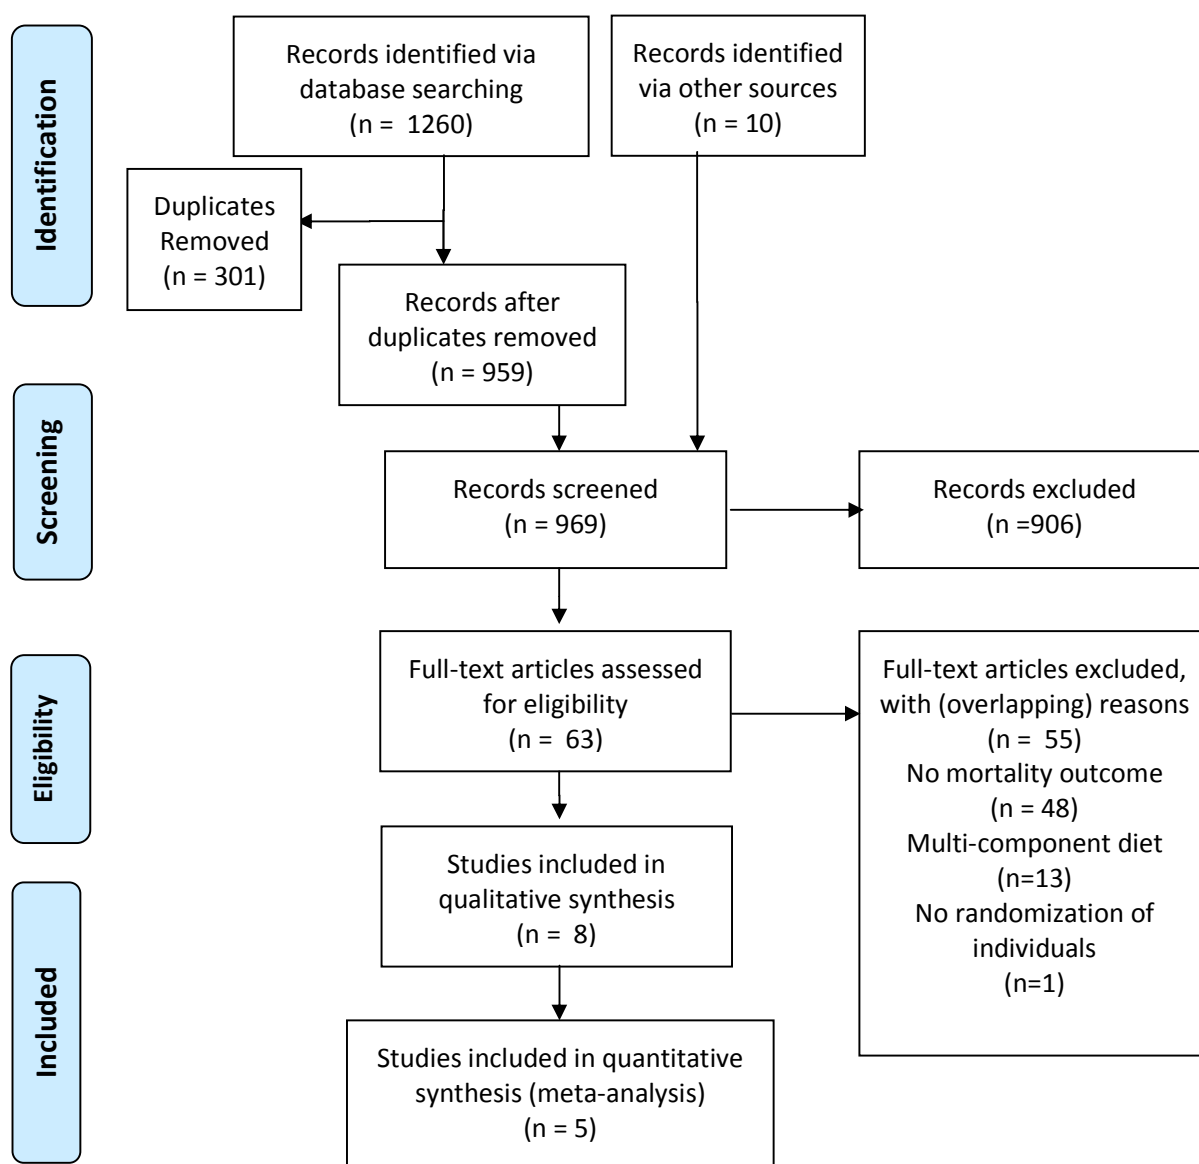

**Fig C. PRISMA diagram: Study screening and eligibility**

**Table J. Characteristics of the 60 excluded dietary intervention studies**

| First author or Study Name, primary aim                                                                              | Dietary interventions                                                                                          | Concomitant interventions                                   | Mortality outcome                                                |
|----------------------------------------------------------------------------------------------------------------------|----------------------------------------------------------------------------------------------------------------|-------------------------------------------------------------|------------------------------------------------------------------|
| 1. Finnish Mental Hospital Study (FMHS) <sup>24-26</sup><br>Effects of diets on mortality                            | Participants were not randomized. Crossover study of two hospitals (one control, one intervention) (see p. 47) | Higher exposure to cardiotoxic drug thioridazine in control | CHD mortality                                                    |
| 2. Lyon Diet Heart Study <sup>27-29</sup><br>Secondary prevention of CHD death                                       | Multiple between-group differences in diet<br><br>Did not substitute LA-rich oil in place of SFA               | No between-group imbalance                                  | CHD mortality<br>Non-fatal infarction                            |
| 3. THIS-DIET <sup>30</sup><br>Secondary prevention of CHD events and death                                           | Multiple between-group differences in diet<br><br>Did not substitute LA-rich oil in place of SFA               | No between-group imbalance                                  | Composite outcome: all-cause + CHD deaths, MI, CHD, HF or stroke |
| 4. Indo-Mediterranean Diet-Heart Study <sup>31</sup><br>Secondary prevention of CHD events and death                 | Multiple between-group differences in diet<br><br>Did not substitute LA-rich oil in place of SFA               | No between-group imbalance                                  | Fatal and non-fatal MI, SCD, composite events.                   |
| 5. Indian Diet Heart Study <sup>32</sup><br>Secondary prevention of CHD events and death                             | Multiple between-group differences in diet                                                                     | No between-group imbalance                                  | Fatal and non-fatal MI, SCD                                      |
| 6. Women's Health Initiative <sup>33</sup> (Howard)<br>Secondary prevention of CHD events and death                  | Multiple between-group differences in diet<br><br>Did not substitute LA-rich oil in place of SFA               | None                                                        | Non-fatal MI, CHD death, CABG/PCI, composite CHD                 |
| 7. Droste <sup>34</sup><br>Effects of diet on cerebral blood flow                                                    | Multiple between-group differences in diet<br><br>Did not substitute LA-rich oil in place of SFA               | Between-group imbalance in lifestyle change recommendations | None                                                             |
| 8. Korhonen <sup>35</sup><br>Effects of diets on blood pressure                                                      | Multiple between-group differences in diet                                                                     | No between-group imbalance                                  | None                                                             |
| 9. Esposito <sup>36</sup><br>In metabolic syndrome, effects of diet on endothelial function and inflammatory markers | Multiple between-group differences in diet<br><br>Did not substitute LA-rich oil in place of SFA               | No between-group imbalance                                  | None                                                             |
| 10. RESMENA <sup>37-40</sup><br>In metabolic syndrome, effect on body composition and oxidative stress               | Multiple between-group differences in diet<br><br>Did not substitute LA-rich oil in place of SFA               | None                                                        | None                                                             |
| 11. Castañer <sup>41</sup><br>Effects of diets on gene expression                                                    | Multiple between-group differences in diet<br><br>Did not substitute LA-rich oil in place of SFA               | None                                                        | None                                                             |

| <b>First author or Study Name, primary aim</b>                                                 | <b>Dietary interventions</b>                                                                   | <b>Concomitant interventions</b> | <b>Mortality outcome</b> |
|------------------------------------------------------------------------------------------------|------------------------------------------------------------------------------------------------|----------------------------------|--------------------------|
| 12. OmniHeart <sup>42,43</sup><br>Effects of diets on CHD risk factors in metabolic syndrome   | High vs. low CHO diet<br>Did not substitute LA-rich oil in place of SFA                        | None                             | None                     |
| 13. Lichtenstein <sup>44</sup><br>Effects of diets on CHD risk factors in hypercholesterolemia | AHA Step 2 diet vs. usual Western<br>Unspecified PUFA                                          | None                             | None                     |
| 14. Mangravite <sup>45,46</sup><br>Effects of diets on CHD risk factors                        | High vs. low SFA: CHO vs. beef<br>Did not substitute LA-rich oil in place of SFA               | None                             | None                     |
| 15. Lecerf <sup>47</sup><br>Effects of diets on lipid profile in hypercholesterolemia          | SFA replaced with MUFA & mixed n-3/n-6 PUFA<br>Multiple between-group differences in diet      | None                             | None                     |
| 16. Nielsen <sup>48</sup><br>Effects of diets on lipid oxidation in hypercholesterolemia       | Canola vs. olive. vs. sunflower oil feeding<br>Did not substitute LA-rich oil in place of SFA  | None                             | None                     |
| 17. Goyens <sup>49</sup><br>Effects of diets on CHD risk markers in older adults               | ALA vs. EPA/DHA rich diet<br>Did not substitute LA-rich oil in place of SFA                    | None                             | None                     |
| 18. Azadbakht <sup>50</sup><br>Effects of diets on CHD risk factors in Type 2 diabetics        | Multiple between-group differences in diet<br>Did not substitute LA-rich oil in place of SFA   | None                             | None                     |
| 19. Raatz <sup>51</sup><br>Effects of diets on lipid metabolites in postmenopausal women       | High fat vs. low fat diet<br>Did not substitute LA-rich oil in place of SFA                    | None                             | None                     |
| 20. Moore <sup>52</sup><br>Effects of diets on CHD risk factors                                | High/low LA+/- high/low n-3 diets<br>Did not substitute LA-rich oil alone in place of SFA      | None                             | None                     |
| 21. Zhang <sup>53</sup><br>Effects of diets on lipid profile in hypercholesterolemia           | Fatty fish substituted for pork/chicken/beef<br>Did not substitute LA-rich oil in place of SFA | None                             | None                     |
| 22. Madigan <sup>54</sup><br>Effects of diets on lipid profile in Type 2 diabetes              | LA-rich vs. Oleic acid-rich diet<br>Did not substitute LA-rich oil in place of SFA             | None                             | None                     |
| 23. Minihane <sup>55</sup><br>Effects of diets on lipids and insulin in Asian Indians          | Moderate vs. high n-6:n-3 PUFA diet<br>Did not substitute LA-rich oil in place of SFA          | None                             | None                     |
| 24. Singer <sup>56</sup><br>Effects of dietary oils on CHD risk factors in hypertensive men    | Oleic vs. LA-rich vs. ALA-rich oils<br>Did not substitute LA-rich oil in place of SFA          | None                             | None                     |

| <b>First author or Study Name, primary aim</b>                                                | <b>Dietary interventions</b>                                                                   | <b>Concomitant interventions</b> | <b>Mortality outcome</b> |
|-----------------------------------------------------------------------------------------------|------------------------------------------------------------------------------------------------|----------------------------------|--------------------------|
| 25. Puska <sup>57-59</sup><br>Effects of diets on blood pressure                              | Two levels of increased PUFA substituted for SFA                                               | None                             | None                     |
| 26. TRANSLinE Study <sup>60-62</sup><br>Effect of diets on CHD risk factors                   | High vs. low TFA<br>Did not substitute LA-rich oil in place of SFA                             | None                             | None                     |
| 27. Han <sup>63</sup><br>Effect of diets on cytokines and cellular immune markers             | SFA vs. TFA vs. Soy oil                                                                        | None                             | None                     |
| 28. Beltsville Human Nutrition Center lipid studies <sup>64-66</sup>                          | Stearic acid, oleic acid feeding studies<br>Did not substitute LA-rich oil in place of SFA     | None                             | None                     |
| 29. Dyerberg <sup>67</sup><br>Effects of diets on CHD risk factors                            | TFA vs. n-3 PUFA<br>Did not substitute LA-rich oil in place of SFA                             | None                             | None                     |
| 30. Sanders <sup>68</sup><br>Effects of diets on lipids/hemostasis                            | n-6 vs n-3 PUFA vs. SFA                                                                        | None                             | None                     |
| 31. RISCK trial <sup>69</sup><br>Effects of diets on insulin sensitivity and CHD risk factors | Multiple between-group differences in diet<br>Did not substitute LA-rich oil in place of SFA   | None                             | None                     |
| 32. Gustafsson <sup>70</sup><br>Effects of diets on lipids                                    | Diets with P/S ratios of 1.3 and 0.7                                                           | None                             | None                     |
| 33. Erkkilä <sup>71</sup><br>Effects of diets on lipids                                       | Lean vs. fatty fish vs. meats<br>Did not substitute LA-rich oil in place of SFA                | None                             | None                     |
| 34. Kondo <sup>72</sup><br>Effects of diets on endothelial function                           | Fish vs. control diet<br>Did not substitute LA-rich oil in place of SFA                        | None                             | None                     |
| 35. Lindqvist <sup>73</sup><br>Effects of diet on CHD biomarkers                              | Fish vs. control diet<br>Did not substitute LA-rich oil in place of SFA                        | None                             | None                     |
| 36. Williams <sup>74</sup><br>Effects of diets on serum lipids                                | MUFA vs. control<br>Did not substitute LA-rich oil in place of SFA                             | None                             | None                     |
| 37. Lithander <sup>75</sup><br>Effect of diets on adiponectin                                 | High vs low SFA:UFA diet<br>Did not substitute LA-rich oil in place of SFA                     | None                             | None                     |
| 38. Mclaughlin <sup>76</sup><br>Effects of diets on CVD risk factors                          | High vs. low CHO in calorie restricted diets<br>Did not substitute LA-rich oil in place of SFA | None                             | None                     |
| 39. Muzio <sup>77</sup><br>Effects of diets on CHD risk factors in metabolic syndrome         | High vs. low CHO in calorie restricted diets<br>Did not substitute LA-rich oil in place of SFA | None                             | None                     |

| <b>First author or Study Name, primary aim</b>                                                           | <b>Dietary interventions</b>                                                                         | <b>Concomitant interventions</b> | <b>Mortality outcome</b> |
|----------------------------------------------------------------------------------------------------------|------------------------------------------------------------------------------------------------------|----------------------------------|--------------------------|
| 40. Raff <sup>78,79</sup><br>Effects of diets on CHD risk factors                                        | CLA vs. Control fat<br>Did not substitute LA-rich oil in place of SFA                                | None                             | None                     |
| 41. Rivellese <sup>80</sup><br>Effects of diets on CVD risk factors                                      | Mixed FA and CHO dietary changes<br>Did not substitute LA-rich oil in place of SFA                   | None                             | None                     |
| 42. LIPGENE study <sup>81-88</sup><br>Effects of diets in metabolic syndrome                             | Hi MUFA vs. SFA vs. CHO<br>Did not substitute LA-rich oil in place of SFA                            | None                             | None                     |
| 43. Rasmussen <sup>89</sup><br>Effects of diets on CVD risk factors                                      | MUFA vs. SFA<br>Did not substitute LA-rich oil in place of SFA                                       | None                             | None                     |
| 44. Zhao <sup>90,91</sup><br>Effects of diets on vascular inflammation in hypercholesterolemia           | ALA vs. LA vs. SFA diets<br>Did not substitute LA-rich oil in place of SFA                           | None                             | None                     |
| 45. Nigam <sup>92</sup><br>Effects of diets on NAFLD                                                     | Olive or canola oil substituted for usual cooking oil—neither is LA-rich                             | None                             | None                     |
| 46. OPTLIP <sup>93</sup><br>Effects of diets on insulin sensitivity                                      | 4 diets altering n-6:n-3 ratios<br>Did not substitute LA-rich oil in place of SFA                    | None                             | None                     |
| 47. Insull <sup>94</sup><br>Effects of diets on lipids                                                   | Partially hydrogenated soybean, corn, sunflower oils; Did not substitute LA-rich oil in place of SFA | None                             | None                     |
| 48. Annuzzi <sup>95</sup><br>Effects of diets on CHD risk markers in metabolic syndrome                  | n-3 +/- polyphenols vs. control<br>Did not substitute LA-rich oil in place of SFA                    | None                             | None                     |
| 49. de Roos <sup>96,97</sup><br>Effects of diets on CHD risk markers                                     | TFA vs. SFA<br>Did not substitute LA-rich oil in place of SFA                                        | None                             | None                     |
| 50. Jenkins <sup>98</sup><br>Effects of diets on CHD risk markers                                        | MUFA vs. SFA<br>Did not substitute LA-rich oil in place of SFA                                       | None                             | None                     |
| 51. Foley <sup>99</sup><br>Effects of diets on lipids                                                    | MUFA vs. PUFA vs. SFA                                                                                | None                             | None                     |
| 52. SYSDIMET <sup>100</sup> (de Mello)<br>Effects of diets on endothelial function in metabolic syndrome | Multiple between-group differences in diet                                                           | None                             | None                     |
| 53. Fuentes <sup>101</sup><br>Effects of diets on endothelial function                                   | SFA vs. MUFA vs. n-6+n-3 PUFA<br>Did not substitute LA-rich oil in place of SFA                      | None                             | None                     |
| 54. Fuentes <sup>102</sup><br>Effects of diets on endothelial function                                   | SFA vs. Mediterranean vs. low TF/SFA diet<br>Did not substitute LA-rich oil in place of SFA          | None                             | None                     |

| First author or Study Name, primary aim                                                                 | Dietary interventions                                                                                                                                                                                               | Concomitant interventions | Mortality outcome                       |
|---------------------------------------------------------------------------------------------------------|---------------------------------------------------------------------------------------------------------------------------------------------------------------------------------------------------------------------|---------------------------|-----------------------------------------|
| 55. WISH-CARE <sup>103</sup> (Vasquez)<br>Effects of fish consumption on lipids in metabolic syndrome   | White fish vs. no fish<br>Did not substitute LA-rich oil in place of SFA                                                                                                                                            | None                      | None                                    |
| 56. Houtsmuller <sup>104</sup><br>Effects of LA vs. SFA margarine on diabetic micro- & macro-angiopathy | Linoleic acid-rich intervention vs. 'saturated margarine' intervention (35%E as SFA).<br>Comparison group with unrealistic amount of SFA (35%E) exclusively from 'saturated margarine'; No usual care control group | None                      | None                                    |
| 57. Borchgrevink <sup>105</sup><br>Secondary prevention of CHD mortality                                | Linseed oil (ALA) vs corn oil (LA) in place of other oils ; no SFA control group                                                                                                                                    | None                      | CHD and all-cause mortality; CVD events |
| 58. Ashton <sup>106</sup><br>Effects of diets on lipids/insulin in healthy males                        | Low fat, high carbohydrate diet vs. high oleic sunflower oil (MUFA)<br>Did not substitute LA-rich oil in place of SFA                                                                                               | None                      | None                                    |
| 59. Teng <sup>107</sup><br>Effects of diets on inflammatory markers                                     | Partially hydrogenated soybean oil vs. high oleic palm oil vs. palm stearin<br>Did not substitute LA-rich oil in place of SFA                                                                                       | None                      | None                                    |
| 60. Christiansen <sup>108</sup><br>Effect of diets on DM markers/lipids among diabetics                 | SFA vs. MUFA vs TFA (trans MUFA)<br>Did not substitute LA-rich oil in place of SFA                                                                                                                                  | None                      | None                                    |

Abbreviations: ALA = alpha linolenic acid; CABG/PCI = coronary artery bypass surgery/percutaneous coronary intervention; CHD = coronary heart disease; CHO = carbohydrate; LA = linoleic acid; MI = myocardial infarction; MUFA = mono-unsaturated fatty acid; PUFA = poly-unsaturated fatty acid; SCD = sudden cardiac death; SFA = saturated fatty acid; TF = total fat; TFA = trans fatty acid.

### RCTs included in the main analysis

Only five RCTs met our inclusion criteria: the Minnesota Coronary Experiment (MCE)<sup>8-12, 109</sup>, the Sydney Diet Heart Study (SDHS)<sup>13, 110-113</sup>, the Rose Corn Oil Trial (RCOT)<sup>114</sup>, the Los Angeles Veterans study (LA Vet)<sup>115-122</sup>, and the Medical Research Council Soy study (MRC Soy)<sup>123, 124</sup> (**table K**). These are the five known RCTs that randomly assigned individual participants to a diet intervention that provided vegetable oil rich in linoleic acid in place of saturated fat compared to a usual care control diet, reported deaths from CHD or all-causes, and had no between-group differences in major concomitant interventions. Compared to control groups, all five intervention groups lowered serum cholesterol (mean range from 8 to 14% lower). They represent a total of 10,808 individuals (5,413 in the intervention diet groups and 5,395 in the control diet group), 324 CHD deaths (169 intervention, 155 control), and 1,001 deaths from all causes (515 intervention, 486 control). Maximum follow-up ranged from 2 years to 7 years.



### **RCTs included in sensitivity analyses**

Three additional RCTs were included in a sensitivity analysis: the Oslo Diet Heart Study (ODHS), the St. Thomas Atherosclerosis Regression Study (STARS), and the Diet and Re-infarction Trial (DART) (**table K**). These diet-heart trials, which randomly assigned individual participants and reported CHD deaths and all-cause mortality, have been included in previous meta-analyses on this topic. However, two of these trials were confounded by unequal application of other dietary factors, and another achieved only a very modest change in dietary LA without provision of study oils.

#### *ODHS*

The ODHS has often been represented as a test of the replacement of SFA with an LA-rich vegetable oil (soybean oil). However, in addition to soybean oil, the intervention group received a very large dose ( $\approx 5$  grams per day) of n-3 EPA+DHA from provision of sardines canned in cod liver oil, and was advised to restrict sugar intake and to replace refined carbohydrates with less processed selections<sup>125-127</sup>. Since EPA+DHA (and sugar) are reported to influence CHD risk by mechanisms independent of serum cholesterol lowering, it is not possible to determine which intervention components were responsible for study results.

#### *STARS*

STARS<sup>128-130</sup> has often been represented as a test of the replacement of SFA with an LA-rich vegetable oil. However, unequal administration of multiple dietary factors do not allow for determination of the effects of LA. For example, the STARS intervention group received advice (and some study foods) to: (1) reduce total fat and SFA; (2) increase n-6 and n-3 polyunsaturated fatty acids, (3) avoid processed<sup>128</sup> foods, and (4) increase dietary fiber (especially the soluble fiber polygalacturonate)<sup>129</sup>. While this intervention had only a very modest (non-statistically significant) increase in n-6 LA (+1.6%E)<sup>128</sup>, it doubled EPA+DHA from (100 to 210 mg per day), lowered total fat by 27%, and increased fiber by 53%. Given these multifaceted changes, the very modest increase in LA likely accounted for only a small fraction of the observed 12.2% serum cholesterol lowering achieved. Taken together, this study design provides little insight into whether replacement of SFA with LA rich vegetable oils can reduce CHD and death. Nevertheless, since other meta-analyses on this topic included STARS, we include it here in sensitivity analysis.

#### *DART*

The DART 'fat advice' intervention group achieved only a very modest reduction in serum cholesterol (-4%), and only modestly increased *total* polyunsaturated fatty acids, without providing study oils or reporting the specific n-6 and n-3 content of such increases. Given these limitations, it is not clear how much the DART results can be expected to help determine whether replacement of SFA with LA-rich oil

reduces risk of CHD and death (the traditional diet heart hypothesis)<sup>131-136</sup>. Nevertheless, since other meta-analyses on this topic included DART, we include it here as a sensitivity analysis.

The eight RCTs in the sensitivity analysis represent a total of 13,328 individuals (6664 in each diet group) with a total of 609 CHD deaths (304 in the treatment, 305 in the control group) and 1,315 deaths from all causes (668 treatment, 657 control).

### **Exclusion of the Finnish Mental Hospital Study (FMHS)**

The FMHS has been included in some previous meta-analyses of RCTs<sup>21</sup>. However, the FMHS is not suitable for inclusion because patients were assigned by hospital and were not randomized as individual patients, among other critical limitations (Reviewed in<sup>109, 137</sup>). For example, there was disproportionate exposure to the cardiotoxic drug thioridazine in one (control) study arm. The FMHS was a 12-year crossover study that assigned two hospitals (Hospital N and Hospital K) of mostly schizophrenic patients (77% in K and 69% in N) in 1959 to either a soybean oil based serum cholesterol-lowering diet (N) or the usual hospital diet (K) for 6 years. After this initial 6-year phase, diets were switched so that Hospital N patients received the Hospital K usual diet and Hospital K patients received a soybean oil diet. Issues related to within-hospital diet exposures at crossover in 1965 also confounded this unusual design. For example, study populations were 'rejuvenated by discarding the six oldest annual cohorts and admitting six new annual cohorts on the younger end of the age range' in 1965<sup>26</sup>.

## Bias Assessment

All studies included in both the main and sensitivity analyses were parallel-group randomized controlled trials with blinded outcome assessment and no apparent systematic between-group differences in medical care (**tables K and L**). The possibility of selective reporting has been documented for both the SDHS<sup>13</sup> and, in this report, the MCE. Potential sources of bias in the five RCTs included in the main analysis are summarized in **tables K and L**.

In the MCE and SDHS, the intervention groups replaced major sources of SFA (e.g. animal fats, common hard margarines, shortenings) with both LA-rich vegetable oils and polyunsaturated soft margarines. Since polyunsaturated margarines contain some trans fatty acids (TFA), it has been speculated that the unfavorable results of these trials could be due to TFA (<http://www.bmj.com/content/346/bmj.e8707/rr/629609>). However, upon careful examination of the intervention diets and the control diets in these RCTs, it becomes clear that between-group differences in TFA are an exceedingly unlikely explanation for these unfavorable findings (reviewed in <http://www.bmj.com/content/346/bmj.e8707/rr/631590>). For example, the liquid vegetable oils and polyunsaturated margarines provided to the intervention groups displaced substantial amounts of common hard margarines, shortenings and other TFA-rich foods that were present in the control diets (see Limitations section in the main paper).

The RCOT was small (n=84), and we only used two of the three randomized groups (corn oil group (n=28) and control diet group (n=26)).

The baseline and control diets in the LA Veterans Study were rich in hydrogenated oils<sup>121</sup> and contained  $\leq 0.1\%$ E  $\alpha$ -linolenic acid (ALA). This extraordinarily low (deficient?) level of ALA is rare in modern diets and is unlikely to be achieved without extensive hydrogenation. Since the intervention increased n-3 ALA to more normative levels (0.7%E), the results of this study may be confounded by one group experiencing recovery from a deficient state.

Potential sources of bias in the three RCTs included in the sensitivity analysis are described above.

**Table K. Characteristics of randomized controlled trials that replaced SFA with LA-rich vegetable oil(s)**

| Trial                                                | Population                                         | Group        | CHD deaths | All-cause deaths | Total sample | Provided LA-rich oil in place of SFA | Confounded by EPA+DHA                | Reduction in serum cholesterol‡ | Maximum follow-up time |
|------------------------------------------------------|----------------------------------------------------|--------------|------------|------------------|--------------|--------------------------------------|--------------------------------------|---------------------------------|------------------------|
| <b>Studies included in primary analysis†</b>         |                                                    |              |            |                  |              |                                      |                                      |                                 |                        |
| Minnesota Coronary <sup>8-12, 109</sup>              | Institutionalized Men & Women with and without CHD | Intervention | 61         | 269              | 4541         | Yes                                  | No                                   | -13.8%                          | ≤ 4.5 years            |
|                                                      |                                                    | Control      | 54         | 248              | 4516         |                                      |                                      |                                 |                        |
| Sydney Diet-Heart <sup>13, 110-113</sup>             | Ambulatory Men with CHD                            | Intervention | 36         | 39               | 221          | Yes                                  | No                                   | -7.8%                           | ≤ 7 years              |
|                                                      |                                                    | Control      | 24         | 28               | 237          |                                      |                                      |                                 |                        |
| Rose Corn Oil <sup>114</sup>                         | Ambulatory Men with CHD                            | Intervention | 5          | 5                | 28           | Yes                                  | No                                   | -11.8%                          | ≤ 2 years              |
|                                                      |                                                    | Control      | 1          | 1                | 26           |                                      |                                      |                                 |                        |
| Los Angeles Veterans <sup>115-122</sup>              | Institutionalized Men with and without CHD         | Intervention | 42         | 174              | 424          | Yes                                  | No                                   | -12.7%                          | ≤ 8 years              |
|                                                      |                                                    | Control      | 51         | 178              | 422          |                                      |                                      |                                 |                        |
| Medical Research Council Soy <sup>123, 124</sup>     | Ambulatory Men with CHD                            | Intervention | 25         | 28               | 199          | Yes                                  | No                                   | -13.3%                          | ≤ 7 years              |
|                                                      |                                                    | Control      | 25         | 31               | 194          |                                      |                                      |                                 |                        |
| <b>Studies included in sensitivity analysis only</b> |                                                    |              |            |                  |              |                                      |                                      |                                 |                        |
| Oslo Diet-Heart <sup>125-127</sup>                   | Ambulatory Men with CHD                            | Intervention | 37         | 41               | 206          | Yes                                  | Yes (5 g/day)                        | -13.9%                          | ≤ 5 years              |
|                                                      |                                                    | Control      | 50         | 55               | 206          |                                      |                                      |                                 |                        |
| St. Thomas Atherosclerosis <sup>128-130</sup>        | Ambulatory Men with CHD                            | Intervention | 1          | 1                | 27           | No                                   | Yes (doubled from 100 to 210 mg/day) | -12.2%                          | ≤ 3 years              |
|                                                      |                                                    | Control      | 3          | 3                | 28           |                                      |                                      |                                 |                        |
| Diet and Re-infarction Trial <sup>131-136</sup>      | Ambulatory Men with CHD                            | Intervention | 35         | 111              | 1018         | No                                   | No                                   | -4%                             | ≤ 2 years              |
|                                                      |                                                    | Control      | 47         | 113              | 1015         |                                      |                                      |                                 |                        |

†The Finnish Mental Hospital Study (FMHS) has been included in some previous meta-analyses of RCT<sup>21</sup>. However, the FMHS is not suitable for inclusion because patients were assigned by hospital and not randomized as individual patients, and the cardiotoxic medication thioridazine was used disproportionately in one study arm<sup>13, 109</sup>. ‡Reports the between-group difference in the change in cholesterol over the course of the trial. Abbreviations: CHD, coronary heart disease; LA, linoleic acid; SFA, saturated fatty acid; EPA, eicosapentaenoic acid; DHA, docosahexaenoic acid

**Table L. Risk of bias and methodological quality and assessments for included randomized controlled trials**

| RCT                                                  | Random sequence generation | Allocation concealment | Blinding of participants & personnel | Selective reporting | Systematic between-group differences in medical care | Other potential bias                                                                                                 | Increased dietary LA?      | Concurrent increase in n-3 ALA and/or EPA+DHA | Achieved serum cholesterol reduction |
|------------------------------------------------------|----------------------------|------------------------|--------------------------------------|---------------------|------------------------------------------------------|----------------------------------------------------------------------------------------------------------------------|----------------------------|-----------------------------------------------|--------------------------------------|
| <b>Studies included in main analysis</b>             |                            |                        |                                      |                     |                                                      |                                                                                                                      |                            |                                               |                                      |
| MCE <sup>8-12</sup> ,<br>109                         | Low                        | Low                    | Double-blind                         | Moderate ‡          | Low                                                  | Low                                                                                                                  | Yes (+8.5%E)               | No                                            | Yes (-13.8%)                         |
| SDHS <sup>13</sup> ,<br>110-113                      | Low                        | Low                    | Blinded outcome assessment           | Moderate ‡          | Low                                                  | Low                                                                                                                  | Yes (+7.1%E)               | No                                            | Yes (-7.8%)                          |
| RCOT<br>114                                          | Low                        | Low                    | Blinded outcome assessment           | Low                 | Low                                                  | Small trial with 3 study groups                                                                                      | Yes (+≈14%E)               | No                                            | Yes (-11.8%)                         |
| LA Vet<br>115-122                                    | Low                        | Low                    | Double-blind                         | Low                 | Low                                                  | Control diet high in hydrogenated oils and n-3 deficient (<0.1%E n-3 ALA)                                            | Yes (+10.0%E)              | Yes (+0.6%E ALA)                              | Yes (-12.7%)                         |
| MRC Soy<br>123, 124                                  | Low                        | Low                    | Blinded outcome assessment           | Low                 | Low                                                  | Low                                                                                                                  | Yes (+≈15%E)               | Yes, (+≈2%E ALA)                              | Yes (-13.3%)                         |
| <b>Studies included in sensitivity analysis only</b> |                            |                        |                                      |                     |                                                      |                                                                                                                      |                            |                                               |                                      |
| ODHS<br>125-127                                      | Low                        | Low                    | Blinded outcome assessment           | Low                 | Low                                                  | Treatment group reduced sugar, low quality carbohydrates. Control diet very high in partially hydrogenated fish oil. | Yes (+12.3%E)              | Yes¶ (+≈5g/d of n-3 EPA+ DHA)                 | Yes (-13.9%)                         |
| STARS<br>128-130                                     | Low                        | Low                    | Blinded outcome assessment           | Low                 | Low                                                  | Small trial with 3 study groups. Run-in phase with cholestyramine. Low-fat diet, increased soluble fiber.            | Very modest (+1.6%E) §     | Doubled EPA+DHA (from 100mg to 210mg per day) | Yes § (-12.2%)                       |
| DART<br>131-136                                      | Low                        | Low                    | Blinded outcome assessment           | Low                 | Low                                                  | Advice only, modest diet changes                                                                                     | Modest (total PUFA +2.8%E) | Unknown                                       | Very modest (-4%)                    |

'Low' refers to low risk of bias, 'moderate' refers to moderate risk of bias

‡ Recovered data included in 2013 and 2015 publications ¶ Massive dose of EPA+DHA due to provision of sardines canned in cod liver oil;

§ STARS had very modest increase LA (+1.6%E), which is predicted to account for only a very small amount of serum cholesterol lowering that was achieved.

|| DART had modest increase in total PUFA (+2.8%E) and modest reduction in serum cholesterol (-4%).

Abbreviations: MCE, Minnesota Coronary Experiment; SDHS, Sydney Diet Heart Study; RCOT, Rose Corn Oil Trial; LA Vet, Los Angeles Veterans Trial; MRC-Soy, Medical Research Council Soybean Oil Trial; ODHS, Oslo Diet Heart Study; STARS, St Thomas Atherosclerosis Regression Study. DART, Diet and Reinfarction Trial; LA, linoleic acid; ALA, alpha-linolenic acid; EPA, eicosapentaenoic acid; DHA, docosahexaenoic acid; PUFA, total polyunsaturated fatty acids

### Meta-analysis

For the CHD mortality outcome, the main analysis resulted in a pooled hazard ratio of 1.13 (95% CI: 0.83, 1.54) with evidence of moderate heterogeneity in both magnitude and direction of effect (**fig D**: I-squared = 45.1%; Tau-squared: 0.0534). The all-cause mortality analysis resulted in similar findings (HR 1.07 (0.90, 1.27); (I-squared of 38.8%; Tau-squared of 0.0132) (**fig E**).

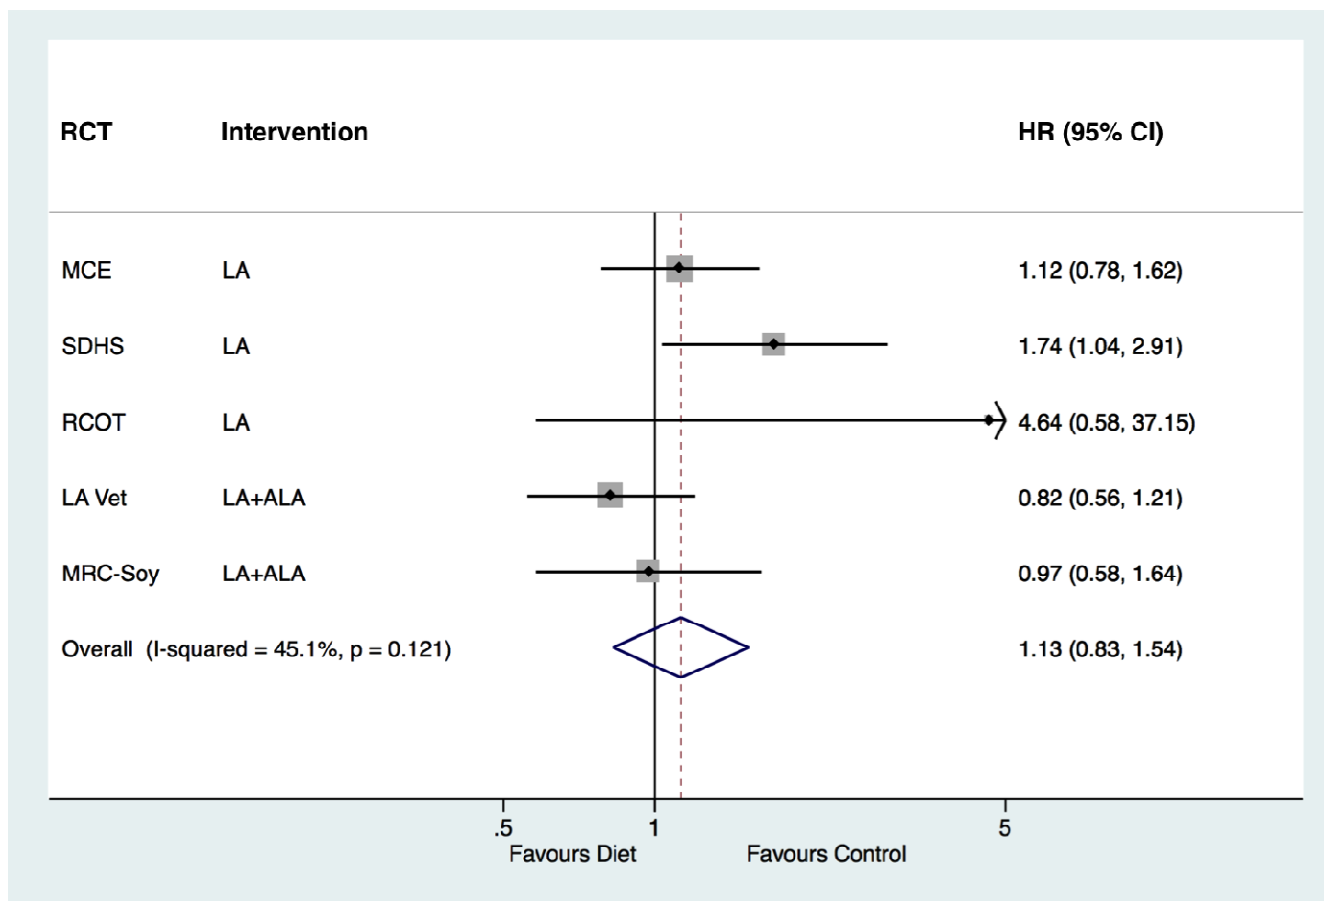

**Fig D. CHD mortality in RCTs providing vegetable oils rich in LA (without added n-3 EPA+DHA) in place of SFA (main analysis)**

Results are based on random-effects models. Risk ratios were substituted for hazard ratios where the latter were unavailable. Abbreviations: MCE, Minnesota Coronary Experiment; SDHS, Sydney Diet Heart Study; RCOT, Rose Corn Oil Trial; LA Vet, Los Angeles Veterans Trial; MRC-Soy, Medical Research Council Soybean Oil Trial; LA, linoleic acid; SFA, saturated fatty acids.

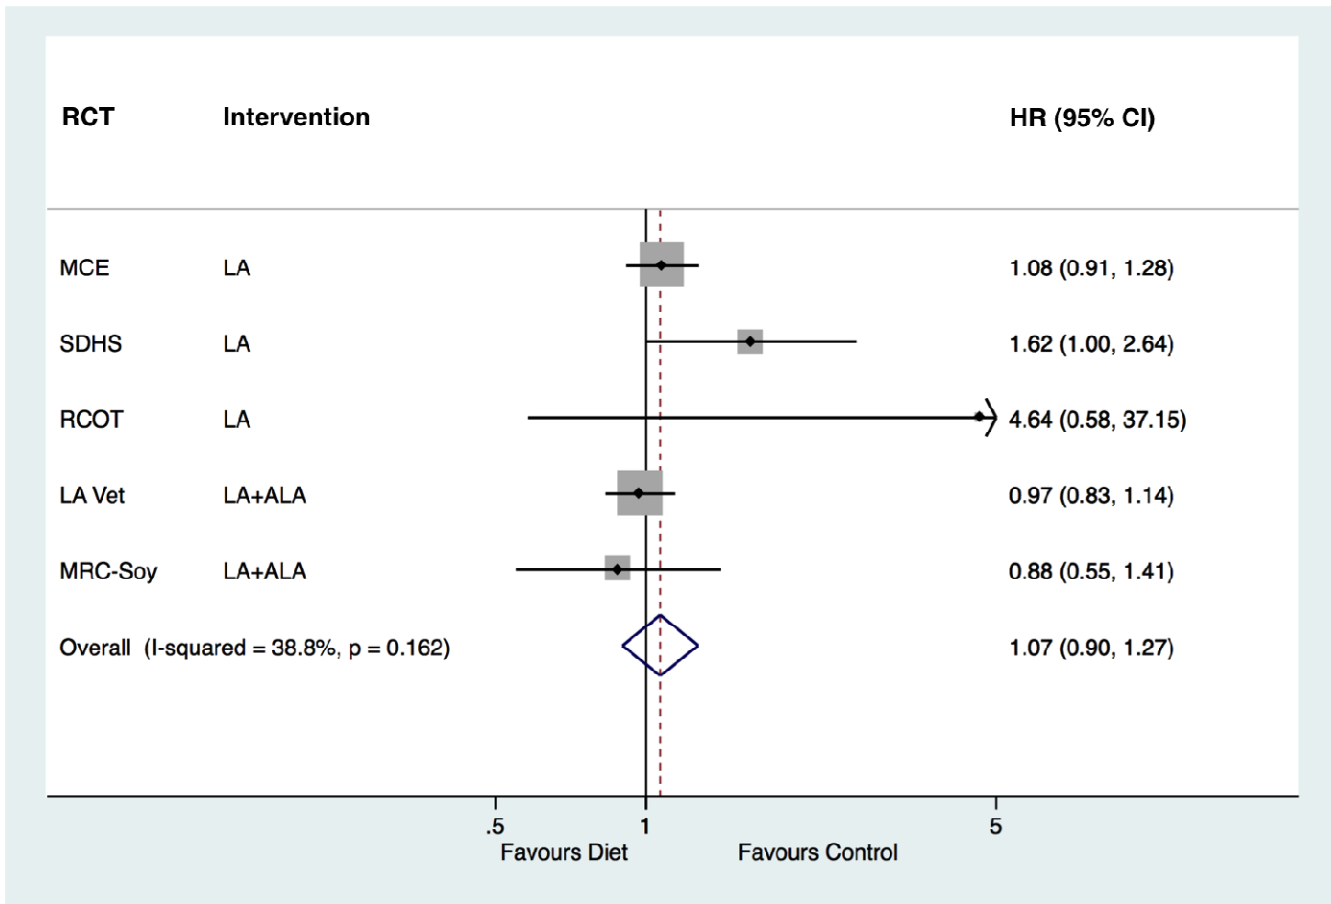

**Fig E. All-cause mortality in RCTs providing vegetable oils rich in LA (without added n-3 EPA+DHA) in place of SFA (main analysis)**

Results are based on random-effects models. Risk ratios were substituted for hazard ratios where the latter were unavailable. Abbreviations: MCE, Minnesota Coronary Experiment; SDHS, Sydney Diet Heart Study; RCOT, Rose Corn Oil Trial; LA Vet, Los Angeles Veterans Trial; MRC-Soy, Medical Research Council Soybean Oil Trial; LA, linoleic acid; ALA, alpha-linolenic acid; SFA, saturated fatty acids.

### Publication bias analysis

Funnel plot inspection of the five RCTs in the main analysis suggested the possibility of publication bias with the Rose Corn Oil Trial an outlier (**fig F**). Thus, a trim and fill analysis was performed, filling in the presumed missing study, along with analyses excluding the small Rose Corn Oil Trial. These sensitivity analyses had minimal influence on pooled HR estimates. For the CHD mortality outcome, the filled, pooled HR was 1.10 (95% CI: 0.79, 1.52). The estimate with the Rose Corn Oil Trial removed was very similar: pooled HR 1.09 (95% CI: 0.81, 1.46). Heterogeneity remained evident with an I-squared of 44.5%. The pooled hazard ratio for all-cause mortality without the Rose Corn Oil Trial was 1.05 (95% CI: 0.90, 1.23) with comparable heterogeneity (I-squared 34.0%).

With the inclusion of the three additional diet-heart trials that provided large quantities of n-3 EPA and DHA, or provided advice only without provision of a study oil that was rich in LA, there was no suggestion

of publication bias (**fig G**). The pooled hazard ratio for CHD mortality (see **fig H**) was 1.00 (95% CI: 0.81, 1.24; I-squared: 37.5%) and for all-cause mortality 1.00 (95% CI: 0.87, 1.15; I-squared: 34.1%) (**fig I**).

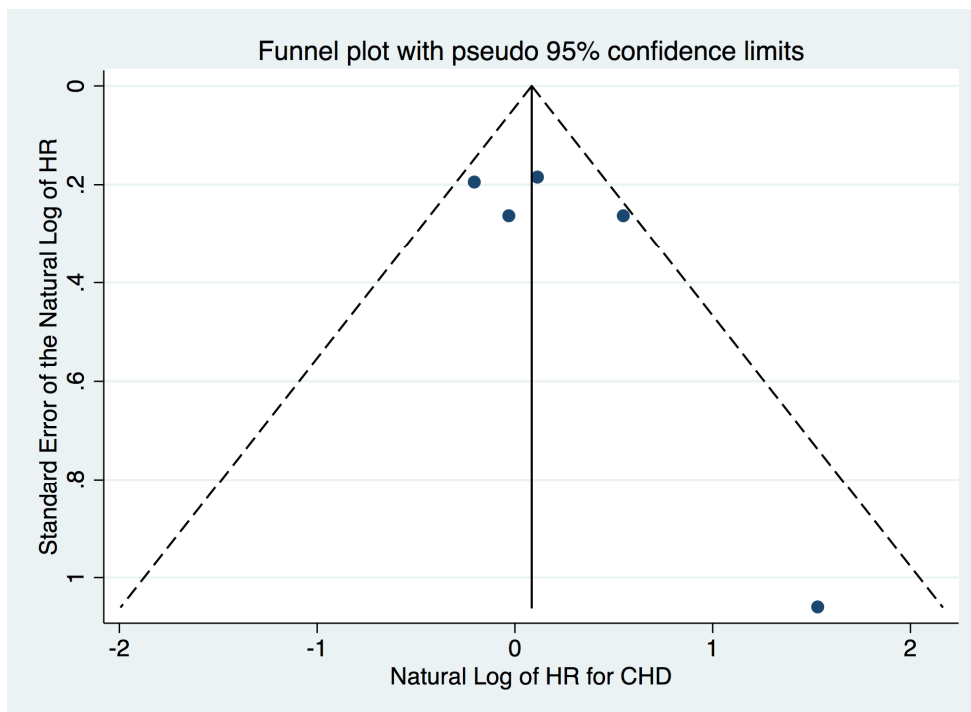

**Fig F. Funnel plot for CHD mortality in five RCTs providing LA-rich oils in place of SFA**  
Funnel plots of treatment effect versus standard error (on the natural log scale) for CHD mortality showed some evidence of skew, raising a concern about potential publication bias. Removal of the Rose Corn Oil Trial mitigated this concern.

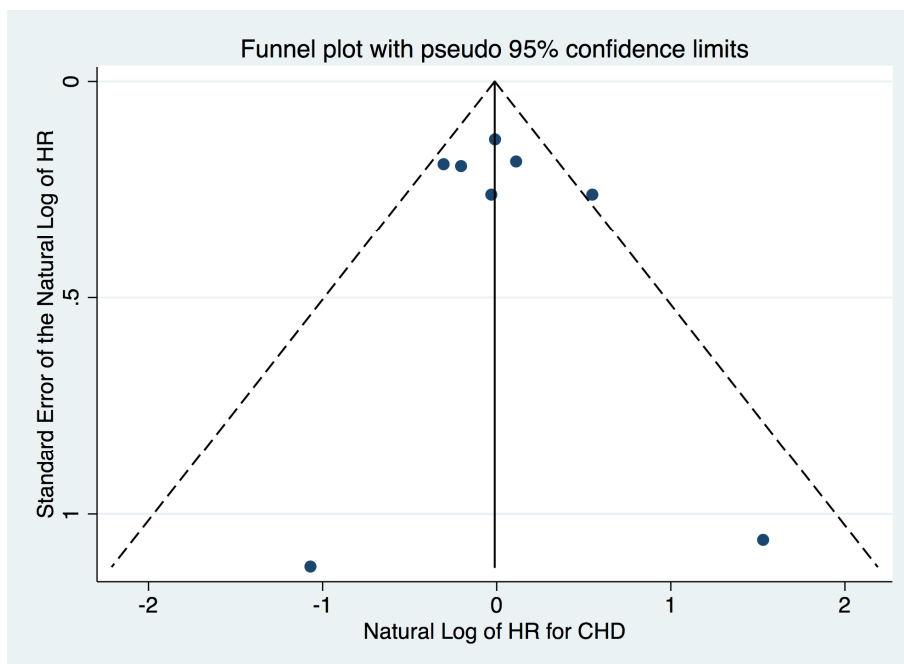

**Fig G. Funnel plot for CHD mortality in eight RCTs with oil provision or advice to replace SFA with LA-rich oils, with or without confounding by n-3 EPA+DHA**



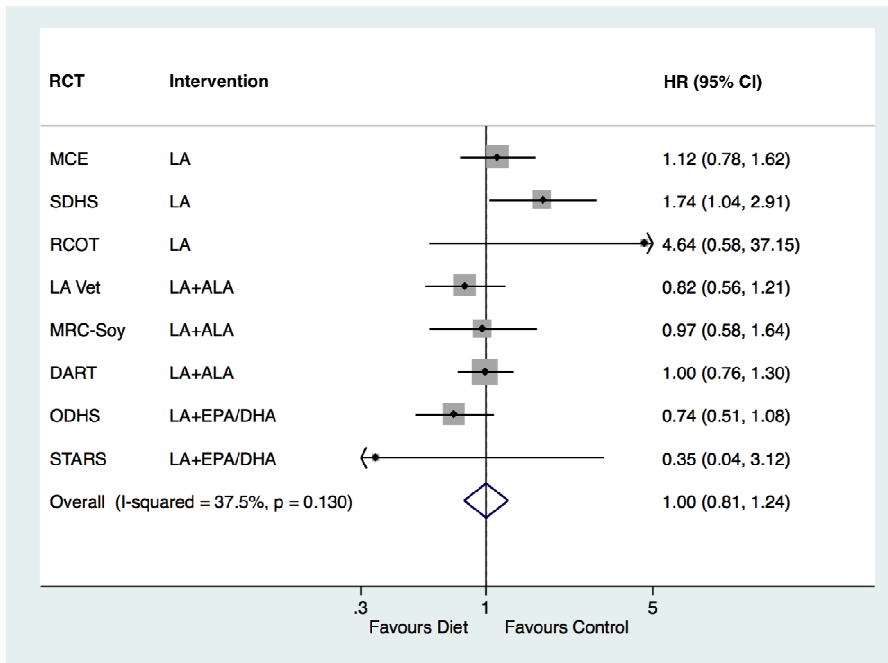

**Fig H. CHD mortality in eight RCTs with provision or advice to replace SFA with LA-rich oils, with or without confounding by n-3 EPA+DHA (sensitivity analysis)**

Abbreviations: MCE, Minnesota Coronary Experiment; SDHS, Sydney Diet Heart Study; RCOT, Rose Corn Oil Trial; LA Vet, Los Angeles Veterans Trial; MRC-Soy, Medical Research Council Soy Oil Trial. DART, Diet and Reinfarction Trial; ODHS, Oslo Diet Heart Study; STARS, St Thomas Atherosclerosis Regression Study. LA, linoleic acid; ALA,  $\alpha$ -linolenic acid; SFA, saturated fat.

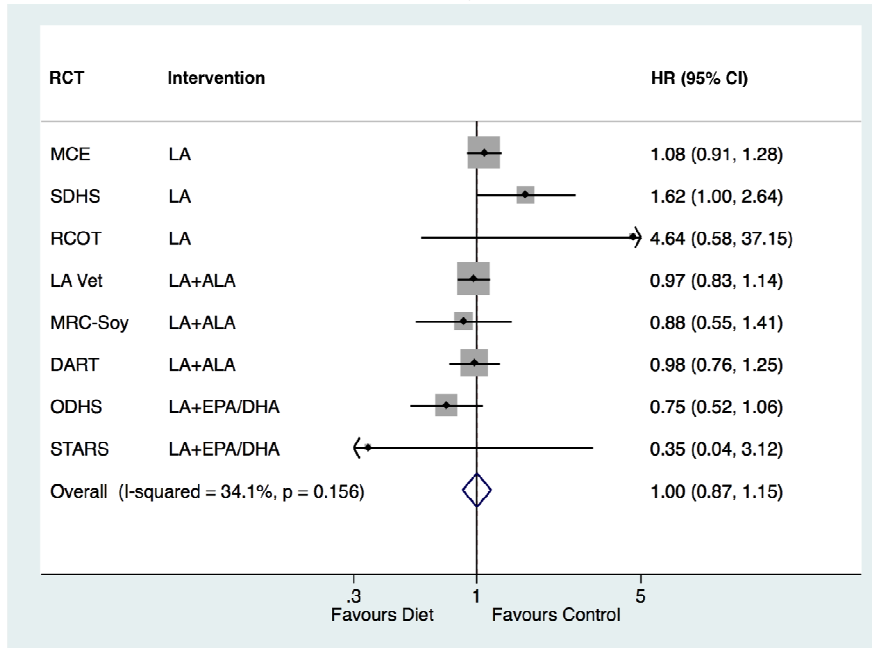

**Fig I. All-cause mortality in eight RCTs with provision or advice to replace SFA with LA-rich oils, with or without confounding by n-3 EPA+DHA (sensitivity analysis)**

Abbreviations: MCE, Minnesota Coronary Experiment; SDHS, Sydney Diet Heart Study; RCOT, Rose Corn Oil Trial; LA Vet, Los Angeles Veterans Trial; MRC-Soy, Medical Research Council Soy Oil Trial. DART, Diet and Reinfarction Trial; ODHS, Oslo Diet Heart Study; STARS, St Thomas Atherosclerosis Regression Study. LA, linoleic acid; ALA,  $\alpha$ -linolenic acid; SFA, saturated fat.

## Heterogeneity Exploration

We explored the following potential sources of heterogeneity for CHD mortality in the eight RCTs: (1) the n-6 and n-3 fatty acid compositions of intervention vs. control diets; (2) the doses of n-6 LA provided/achieved in the intervention group; and (3) the degree of serum cholesterol lowering achieved in the intervention group compared to control. Three RCTs increased n-6 LA only, three others increased both n-6 LA and n-3 ALA, and two others increased both n-6 LA and n-3 EPA+DHA. Heterogeneity between groups was statistically significant ( $p=0.03$ ;  $I^2=37.5\%$ ) with no evidence for heterogeneity within either the LA+ALA or LA+EPA/DHA groups ( $I^2=0\%$ ). Evidence for heterogeneity in the LA only group persisted ( $I^2=37.5\%$ ), but was related to the magnitude rather than the direction of the effect. The pooled HR for CHD mortality for the studies providing LA alone was 1.33 (0.99, 1.79) compared to 0.94 (0.77, 1.15) for studies with LA+ALA and 0.72 (0.50, 1.05) for studies providing LA+EPA/DHA (**fig J**).

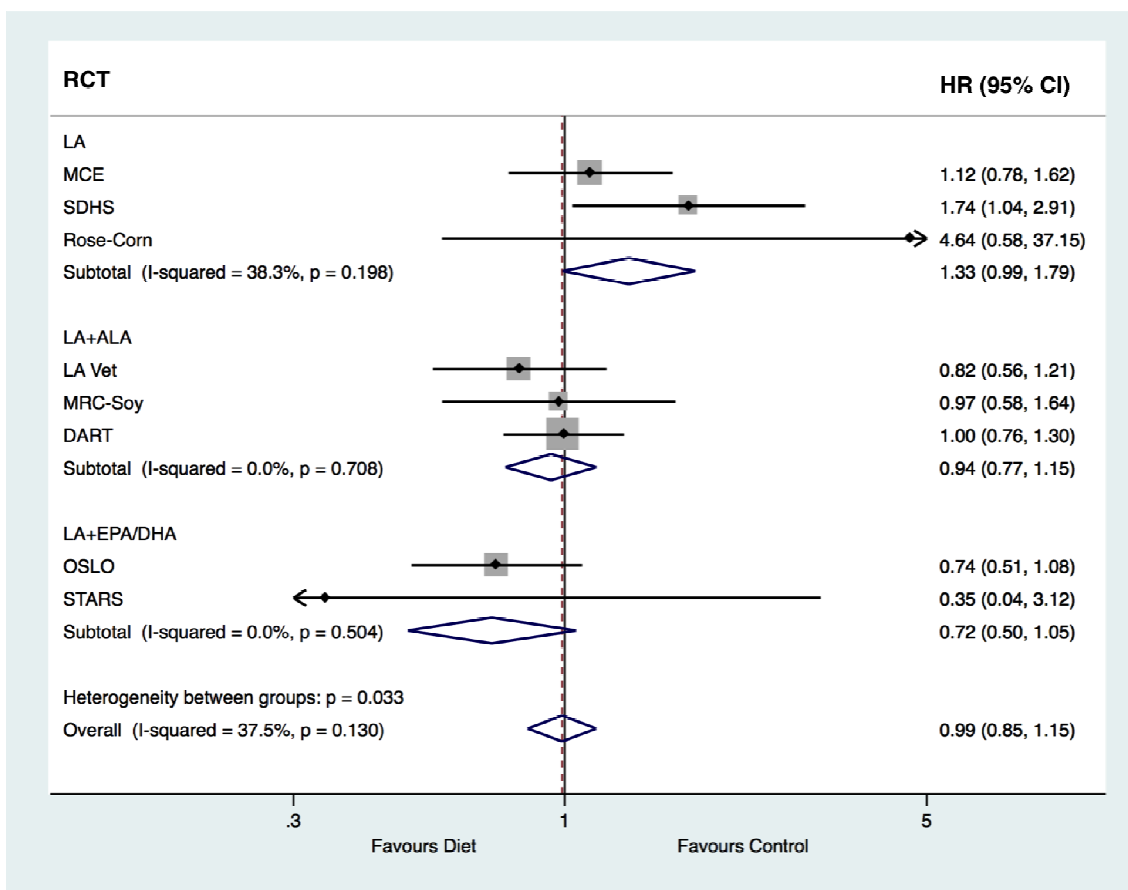

**Fig J. CHD mortality in eight RCTs with provision or advice to replace SFA with LA-rich oils, with or without confounding by n-3 EPA+DHA, stratified by n-6 and n-3 fatty acid content (sensitivity analysis)\***

\*fixed effects estimates

Abbreviations: MCE, Minnesota Coronary Experiment; SDHS, Sydney Diet Heart Study; RCOT, Rose Corn Oil Trial; LA Vet, Los Angeles Veterans Trial; MRC-Soy, Medical Research Council Soybean Oil Trial. DART, Diet and Reinfarction Trial; ODHS, Oslo Diet Heart Study; STARS, St Thomas Atherosclerosis Regression Study.

Meta-regression analyses explored heterogeneity in the CHD mortality HR due to between-group cholesterol lowering and the magnitude of the increase in LA in the intervention groups. Across the eight studies, every one-unit decrease in between-group cholesterol lowering was non-significantly associated with a 2% increase in the HR (1.02; 95% CI: 0.95, 1.10). This model performed poorly compared with the model without between-group cholesterol lowering with a residual  $I^2$  of 42% and an adjusted  $R^2$  of -107%. Similar null findings are noted when the change in LA (%E) is examined (HR 1.02; 95% CI: 0.95, 1.10; residual  $I^2$  42%; adjusted  $R^2$  of -76%), suggesting that neither the magnitude of serum cholesterol lowering nor the dose of LA help to explain the heterogeneity among the trials.

### **Effects on composite CHD endpoints non-fatal myocardial infarction**

The traditional diet-heart hypothesis predicts that replacement of SFA with LA-rich vegetable oils will reduce the risk of *both* non-fatal and fatal CHD events, however, our meta-analysis does not include non-fatal CHD event data. Unfortunately, several critical deficiencies in the collection and reporting of non-fatal CHD events in these RCTs make it unfeasible to reliably estimate risk of composite CHD or non-fatal events. For example, one of the five RCTs in the main analysis (the SDHS) did not report non-fatal CHD events<sup>113</sup>. Another RCT (the MCE) reported only a composite outcome and did not distinguish between soft endpoints (e.g. routine follow-up EKG suggestive of silent/asymptomatic myocardial infarction), and hard endpoints of acute non-fatal myocardial infarction (MI) and CHD deaths<sup>8</sup>.

Aware of these limitations, we performed exploratory sensitivity analyses of the composite endpoint (MI plus CHD death) and non-fatal MI alone (**figs K and L**, respectively). For the MCE, we estimated non-fatal MI by subtracting deaths attributed to "Cardiac Arrest, Heart Block" (making the assumptions that "Cardiac Arrest, Heart Block" is essentially comparable to "Sudden cardiac deaths" and that all MIs were non-fatal). There was no indication of benefit from the replacement of SFA with LA-rich vegetable oils using either composite MI plus CHD death or non-fatal MI as outcomes. For the composite outcome of MI plus CHD mortality, there was a pooled hazard ratio of 1.07 (95% CI: 0.80, 1.41). For the non-fatal MI outcome, there was a pooled hazard ratio of 0.94 (95% CI: 0.73, 1.21).

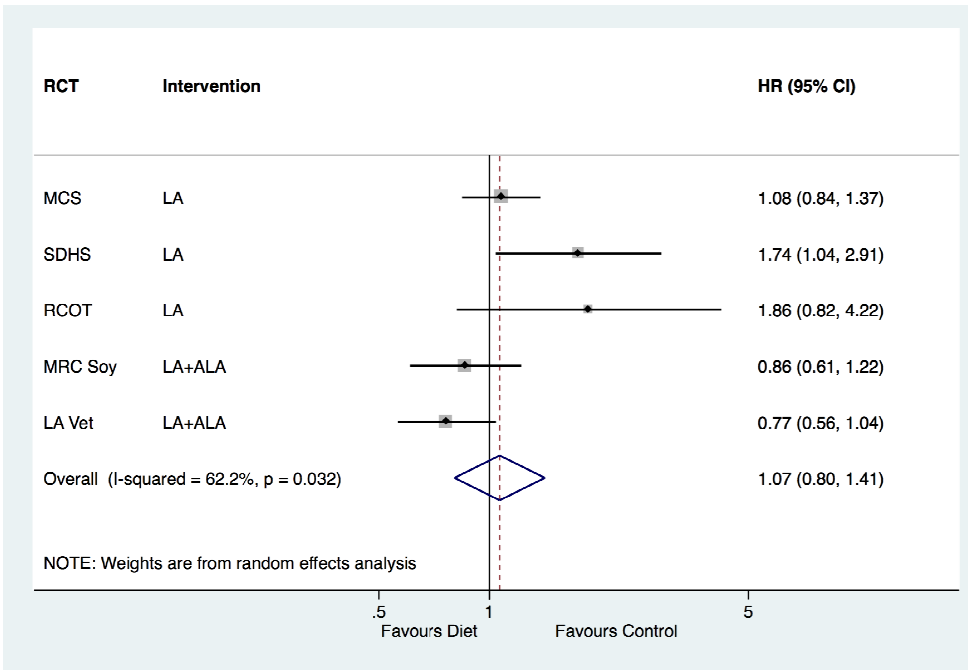

**Fig K. Composite endpoint (myocardial infarcts plus CHD mortality) in RCTs providing vegetable oils rich in LA (without added n-3 EPA+DHA) in place of SFA (sensitivity analysis)**  
 Abbreviations: MCE, Minnesota Coronary Experiment; SDHS, Sydney Diet Heart Study; RCOT, Rose Corn Oil Trial; LA Vet, Los Angeles Veterans Trial; MRC-Soy, Medical Research Council Soybean Oil Trial. DART, Diet and Reinfarction Trial; ODHS, Oslo Diet Heart Study; STARS, St Thomas Atherosclerosis Regression Study.

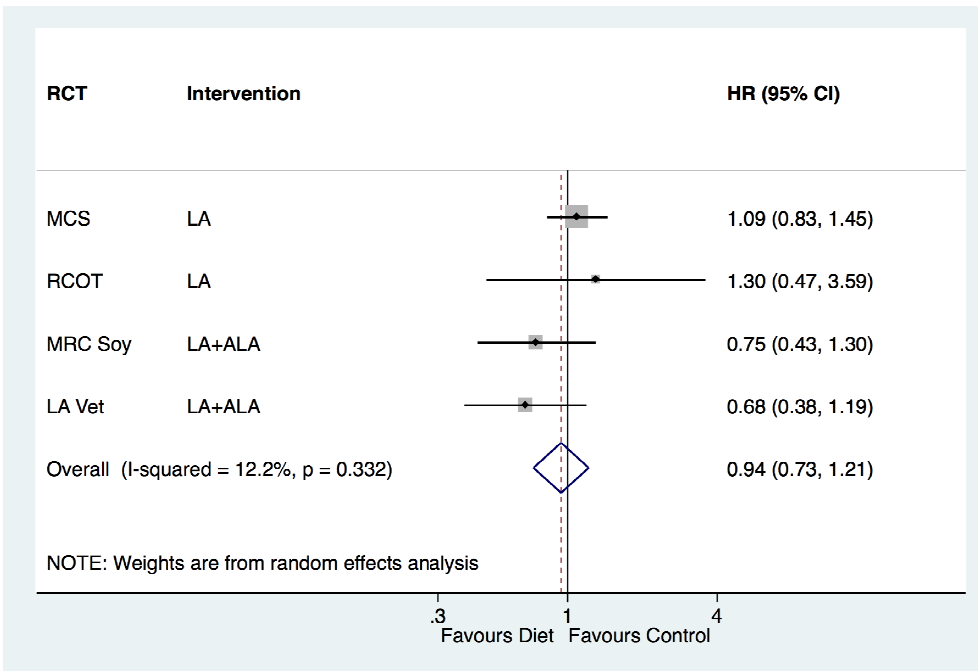

**Fig L. Non-fatal myocardial infarcts in RCTs providing vegetable oils rich in LA (without added n-3 EPA+DHA) in place of SFA (sensitivity analysis)**  
 Abbreviations: MCE, Minnesota Coronary Experiment; SDHS, Sydney Diet Heart Study; RCOT, Rose Corn Oil Trial; LA Vet, Los Angeles Veterans Trial; MRC-Soy, Medical Research Council Soybean Oil Trial. DART, Diet and Reinfarction Trial; ODHS, Oslo Diet Heart Study; STARS, St Thomas Atherosclerosis Regression Study.

## **DISCUSSION**

### **Summary of Evidence**

In our main meta-analyses, based on the five RCTs that provided LA-rich vegetable oil in place of SFA, we found no evidence for reductions in either CHD mortality or all-cause mortality. This conclusion was unchanged after sensitivity analyses that either 1) included RCTs that offered advice only or that, in addition to LA sources, also provided n-3 EPA and DHA, or 2) included composite or non-fatal endpoints. However, evidence of moderate heterogeneity weakens the conclusions we can make about the CHD mortality findings and their ability to translate into recommendations for the population. Exploratory analyses suggest that neither the between-group differences in serum cholesterol lowering nor the doses of LA provided help to explain this heterogeneity.

### **Limitations**

The small number of RCTs that have tested the traditional diet-heart hypothesis replacing SFA with LA-rich vegetable oil is an important limitation of our meta-analysis. Remarkably, only five diet-heart RCTs have specifically tested whether provision of an LA-rich vegetable oil in place of SFA reduced risk of CHD death or all-cause mortality. The fact that the MCE accounted for about 80% of all randomized participants in these trials highlights the paucity of causal RCT evidence supporting the traditional diet heart hypothesis and the importance of the MCE in assessing the evidence base for LA-rich interventions. Even with inclusion of advice-only RCTs (with only modest diet changes and other limitations) and RCTs confounded by provision of large quantities of n-3 EPA+DHA in sensitivity analyses, MCE still accounted for 68% of all randomized participants. The small number of RCTs, coupled with differences in methodological quality and design, and population characteristics of the individual RCTs (**tables K and L**) (reviewed in <sup>13, 109</sup>) indicate that more research is needed in this area before evidence-based recommendations can be supported.

### **Conclusion**

Available RCT evidence demonstrates that replacement of SFA with LA-rich vegetable oil effectively lowers serum cholesterol, but does not support the hypothesis that this translates to lower risk of death from CHD or all-causes.

## References

1. Frantz, I.D. Results of treatment of hyperlipidemias: Long-term compliance and effects on lipid metabolism. In: Atherosclerosis. Manning, GW, Haust, M.D., editors, Plenum Publishing, New York, NY, 1977.
2. Laine DC, Snodgrass CM, Dawson EA, Ener MA, Kuba K, Frantz ID, Jr. Lightly hydrogenated soy oil versus other vegetable oils as a lipid-lowering dietary constituent. *The American journal of clinical nutrition*. 1982 Apr;35(4):683-90. PubMed PMID: 7200319.
3. Frantz ID, Jr., Ashman PL. Design of dietary experiments for preventing myocardial infarction. *J Am Diet Assoc*. 1968 Apr;52(4):293-9. PubMed PMID: 5643389. Epub 1968/04/01. eng.
4. Frantz IDJP. R01 HE 0986-02 Supplementary Progress Report: Effect of a Dietary Change on Human Cardiovascular Disease "The Minnesota Coronary Survey", August 31, 1967.
5. Frantz ID, Jr. (PI). R01 HE 0986-02 Second Supplementary Progress Report: Effect of a Dietary Change on Human Cardiovascular Disease "The Minnesota Coronary Survey", September 25, 1967.
6. Spiekerman RE, Brandenburg JT, Achor RW, Edwards JE. The spectrum of coronary heart disease in a community of 30,000. A clinicopathologic study. *Circulation*. 1962 Jan;25:57-65. PubMed PMID: 13915765.
7. Frantz ID, Jr. (PI), Keys, A (Co-I). R01 HE 0986-03 Research Grant Application: Effect of a Dietary Change on Human Cardiovascular Disease "The Minnesota Coronary Survey". 1967.
8. Frantz ID, Jr., Dawson EA, Ashman PL, et al. Test of effect of lipid lowering by diet on cardiovascular risk. *The Minnesota Coronary Survey. Arteriosclerosis (Dallas, Tex)*. 1989 Jan-Feb;9(1):129-35. PubMed PMID: 2643423. Epub 1989/01/01. eng.
9. Broste S. Lifetable Analysis of the Minnesota Coronary Survey: University of Minnesota; 1981.
10. Brewer ER, Ashman PL, Kuba K. The Minnesota Coronary Survey: composition of their diets, adherence, and serum lipid response. *Circulation*. 1975 October;51 & 52(Supplement II):II-269.
11. Dawson E, Gatewood L. The Minnesota coronary survey: methodology and characteristics of the population. *Circulation*. 1975;52 (Suppl 2):271.
12. Frantz ID, Dawson, E.A., Kuba, K., Brewer, E.R., Gatewood, L.C., Bartsch, G.E. The Minnesota Coronary Survey: Effect of diet on cardiovascular events and deaths. *American Heart Association Scientific Proceedings*. 1975 October 51 & 52(Supplement II):II-4.
13. Ramsden CE, Zamora D, Leelarthaepin B, et al. Use of dietary linoleic acid for secondary prevention of coronary heart disease and death: evaluation of recovered data from the Sydney Diet Heart Study and updated meta-analysis. *BMJ (Clinical research ed)*. 2013;346:e8707. PubMed PMID: 23386268. Epub 2013/02/07. eng.
14. Control Data Corporation, Kronos 2.1 Time-sharing User's Reference Manual. Conversion Key Table B-2 (p106). Cyber70 Series Models 72/73/74, 6000 Series Computer Systems. Technical Publications Department. Arden Hills, MN. 1974.
15. Blasbalg TL, Hibbeln JR, Ramsden CE, Majchrzak SF, Rawlings RR. Changes in consumption of omega-3 and omega-6 fatty acids in the United States during the 20th century. *The American journal of clinical nutrition*. 2011 May;93(5):950-62. PubMed PMID: 21367944. Pubmed Central PMCID: 3076650.
16. Centers for Disease Control and Prevention, National Center for Health Statistics, Leading Causes of Death, 1900-1998. [http://www.cdc.gov/nchs/data/dvs/lead1900\\_98.pdf](http://www.cdc.gov/nchs/data/dvs/lead1900_98.pdf). [Accessed April 2015].
17. Willett WC. The role of dietary n-6 fatty acids in the prevention of cardiovascular disease. *Journal of cardiovascular medicine*. 2007 Sep;8 Suppl 1:S42-5. PubMed PMID: 17876199.

18. US Department of Agriculture, Agricultural Research Service, Nutrient Data Laboratory. USDA National Nutrient Database for Standard Reference, Release 27 (slightly revised). Version Current: May 2015. Internet: <http://www.ars.usda.gov/ba/bhnrc/ndl>
19. Chowdhury R, Warnakula S, Kunutsor S, et al. Association of dietary, circulating, and supplement fatty acids with coronary risk: a systematic review and meta-analysis. *Ann Intern Med*. 2014 Mar 18;160(6):398-406. PubMed PMID: 24723079.
20. Hooper L, Martin N, Abdelhamid A, Davey Smith G. Reduction in saturated fat intake for cardiovascular disease. *Cochrane Database Syst Rev*. 2015;6:CD011737. PubMed PMID: 26068959.
21. Mozaffarian D, Micha R, Wallace S. Effects on Coronary Heart Disease of Increasing Polyunsaturated Fat in Place of Saturated Fat: A Systematic Review and Meta-Analysis of Randomized Controlled Trials. *Plos Medicine*. 2010 Mar;7(3):- . PubMed PMID: ISI:000276311600013. English.
22. Moher D, Liberati A, Tetzlaff J, Altman DG, Grp P. Preferred reporting items for systematic reviews and meta-analyses: the PRISMA statement. *Bmj-Brit Med J*. 2009 Jul 21;339. PubMed PMID: WOS:000268351400018. English.
23. DerSimonian R, Laird N. Meta-analysis in clinical trials. *Control Clin Trials*. 1986 Sep;7(3):177-88. PubMed PMID: 3802833.
24. Miettinen M, Turpeinen O, Karvonen MJ, Pekkarinen M, Paavilainen E, Elosuo R. Dietary prevention of coronary heart disease in women: the Finnish mental hospital study. *International journal of epidemiology*. 1983 Mar;12(1):17-25. PubMed PMID: 6840954. Epub 1983/03/01. eng.
25. Miettinen M, Turpeinen O, Karvonen MJ, Elosuo R, Paavilainen E. Effect of cholesterol-lowering diet on mortality from coronary heart-disease and other causes. A twelve-year clinical trial in men and women. *Lancet*. 1972 Oct 21;2(7782):835-8. PubMed PMID: 4116551. Epub 1972/10/21. eng.
26. Turpeinen O, Karvonen MJ, Pekkarinen M, Miettinen M, Elosuo R, Paavilainen E. Dietary prevention of coronary heart disease: the Finnish Mental Hospital Study. *International journal of epidemiology*. 1979 Jun;8(2):99-118. PubMed PMID: 393644. Epub 1979/06/01. eng.
27. De Lorgeril M, Renaud S, Mamelle N, et al. Mediterranean alpha-linolenic acid-rich diet in secondary prevention of coronary heart disease. *Lancet*. 1994;343(8911):1454-9.
28. De Lorgeril M, Salen P, Martin JL, et al. Effect of a mediterranean type of diet on the rate of cardiovascular complications in patients with coronary artery disease. Insights into the cardioprotective effect of certain nutriments. *Journal of the American College of Cardiology*. 1996;28(5):1103-8.
29. De Lorgeril M, Salen P, Martin JL, Monjaud I, Boucher P, Mamelle N. Mediterranean dietary pattern in a randomized trial: Prolonged survival and possible reduced cancer rate. *Archives of Internal Medicine*. 1998;158(11):1181-7.
30. Tuttle KR, Shuler LA, Packard DP, et al. Comparison of Low-Fat Versus Mediterranean-Style Dietary Intervention After First Myocardial Infarction. *American Journal of Cardiology*. 2008;101(11):1523-30.
31. Singh RB, Dubnov G, Niaz MA, et al. Effect of an Indo-Mediterranean diet on progression of coronary artery disease in high risk patients (Indo-Mediterranean Diet Heart Study): A randomised single-blind trial. *Lancet*. 2002;360(9344):1455-61.
32. Singh RB, Rastogi SS, Verma R, Bolaki L, Singh R. An Indian experiment with nutritional modulation in acute myocardial infarction. *The American journal of cardiology*. 1992 Apr 1;69(9):879-85. PubMed PMID: 1550016. Epub 1992/04/01. eng.

33. Howard BV, Van Horn L, Hsia J, et al. Low-fat dietary pattern and risk of cardiovascular disease: The Women's Health Initiative randomized controlled dietary modification trial. *Journal of the American Medical Association*. 2006;295(6):655-66.
34. Droste DW, Iliescu C, Vaillant M, et al. Advice on lifestyle changes (Diet, Red Wine and Physical Activity) does not affect internal carotid and middle cerebral artery blood flow velocity in patients with carotid arteriosclerosis in a randomized controlled trial. *Cerebrovascular Diseases*. 2014;37(5):368-75.
35. Korhonen M, Kastarinen M, Uusitupa M, Puska P, Nissinen A. The effect of intensified diet counseling on the diet of hypertensive subjects in primary health care: a 2-year open randomized controlled trial of lifestyle intervention against hypertension in eastern Finland. *Preventive medicine*. 2003 Jan;36(1):8-16. PubMed PMID: 12473420. Epub 2002/12/11. eng.
36. Esposito K, Marfella R, Ciotola M, et al. Effect of a Mediterranean-style diet on endothelial dysfunction and markers of vascular inflammation in the metabolic syndrome: A randomized trial. *Journal of the American Medical Association*. 2004;292(12):1440-6.
37. De La Iglesia R, Lopez-Legarrea P, Abete I, et al. A new dietary strategy for long-term treatment of the metabolic syndrome is compared with the American Heart Association (AHA) guidelines: The METabolic Syndrome REDuction in NAVarra (RESMENA) project. *British Journal of Nutrition*. 2014;111(4):643-52.
38. de la Iglesia R, Lopez-Legarrea P, Celada P, Sánchez-Muniz FJ, Martinez JA, Zulet MA. Beneficial effects of the RESMENA dietary pattern on oxidative stress in patients suffering from metabolic syndrome with hyperglycemia are associated to dietary TAC and fruit consumption. *International Journal of Molecular Sciences*. 2013;14(4):6903-19.
39. Lopez-Legarrea P, De La Iglesia R, Abete I, et al. Short-term role of the dietary total antioxidant capacity in two hypocaloric regimes on obese with metabolic syndrome symptoms: The RESMENA randomized controlled trial. *Nutrition and Metabolism*. 2013;10(1).
40. Perez-Cornago A, Lopez-Legarrea P, de la Iglesia R, Lahortiga F, Martinez JA, Zulet MA. Longitudinal relationship of diet and oxidative stress with depressive symptoms in patients with metabolic syndrome after following a weight loss treatment: The RESMENA project. *Clinical Nutrition*. 2014;33(6):1061-7.
41. Castañer O, Corella D, Covas MI, et al. In vivo transcriptomic profile after a Mediterranean diet in high-cardiovascular risk patients: A randomized controlled trial. *American Journal of Clinical Nutrition*. 2013;98(3):845-53.
42. Appel LJ, Sacks FM, Carey VJ, et al. Effects of protein, monounsaturated fat, and carbohydrate intake on blood pressure and serum lipids: results of the OmniHeart randomized trial. *Jama*. 2005 Nov 16;294(19):2455-64. PubMed PMID: 16287956. Epub 2005/11/17. eng.
43. Haring B, Wyler Von Ballmoos MC, Appel LJ, Sacks FM. Healthy dietary interventions and lipoprotein (a) plasma levels: Results from the omni heart trial. *PLoS ONE*. 2014;9(12).
44. Lichtenstein AH, Ausman LM, Jalbert SM, et al. Efficacy of a Therapeutic Lifestyle Change/Step 2 diet in moderately hypercholesterolemic middle-aged and elderly female and male subjects. *Journal of Lipid Research*. 2002;43(2):264-73.
45. Faghihnia N, Mangravite LM, Chiu S, Bergeron N, Krauss RM. Effects of dietary saturated fat on LDL subclasses and apolipoprotein CIII in men. *European Journal of Clinical Nutrition*. 2012;66(11):1229-33.
46. Mangravite LM, Chiu S, Wojnoonski K, Rawlings RS, Bergeron N, Krauss RM. Changes in atherogenic dyslipidemia induced by carbohydrate restriction in men are dependent on dietary protein source. *Journal of Nutrition*. 2011;141(12):2180-5.



47. Lecerf JM, Luc G, Marecaux N, et al. Small, qualitative changes in fatty acid intake decrease plasma low-density lipoprotein-cholesterol levels in mildly hypercholesterolemic outpatients on their usual high-fat diets. *Int J Food Sci Nutr*. 2009;60 Suppl 7:151-63. PubMed PMID: 19381991. Epub 2009/04/22. eng.
48. Nielsen NS, Pedersen A, Sandstrom B, Marckmann P, Hoy CE. Different effects of diets rich in olive oil, rapeseed oil and sunflower-seed oil on postprandial lipid and lipoprotein concentrations and on lipoprotein oxidation susceptibility. *Br J Nutr*. 2002 May;87(5):489-99. PubMed PMID: 12010587. Epub 2002/05/16. eng.
49. Goyens PLL, Mensink RP. Effects of alpha-linolenic acid versus those of EPA/DHA on cardiovascular risk markers in healthy elderly subjects. *European Journal of Clinical Nutrition*. 2006;60(8):978-84.
50. Azadbakht L, Surkan PJ, Esmailzadeh A, Willett WC. The dietary approaches to stop hypertension eating plan affects C-reactive protein, coagulation abnormalities, and hepatic function tests among type 2 diabetic patients. *Journal of Nutrition*. 2011;141(6):1083-8.
51. Raatz SK, Young LR, Picklo MJ, Sauter ER, Qin W, Kurzer MS. Total dietary fat and fatty acid content modifies plasma phospholipid fatty acids, desaturase activity indices, and urinary prostaglandin E in women. *Nutrition Research*. 2012;32(1):1-7.
52. Moore CS, Bryant SP, Mishra GD, et al. Oily fish reduces plasma triacylglycerols: a primary prevention study in overweight men and women. *Nutrition*. 2006;22(10):1012-24.
53. Zhang J, Wang C, Li L, et al. Dietary inclusion of salmon, herring and pompano as oily fish reduces CVD risk markers in dyslipidaemic middle-aged and elderly Chinese women. *British Journal of Nutrition*. 2012;108(8):1455-65.
54. Madigan C, Ryan M, Owens D, Collins P, Tomkin GH. Dietary unsaturated fatty acids in type 2 diabetes: higher levels of postprandial lipoprotein on a linoleic acid-rich sunflower oil diet compared with an oleic acid-rich olive oil diet. *Diabetes care*. 2000 Oct;23(10):1472-7. PubMed PMID: 11023139. Epub 2000/10/07. eng.
55. Minihane AM, Brady LM, Lovegrove SS, Lesauvage SV, Williams CM, Lovegrove JA. Lack of effect of dietary n-6:n-3 PUFA ratio on plasma lipids and markers of insulin responses in Indian Asians living in the UK. *European Journal of Nutrition*. 2005;44(1):26-32.
56. Singer P, Jaeger W, Berger I, et al. Effects of dietary oleic, linoleic and  $\alpha$ -linolenic acids on blood pressure, serum lipids, lipoproteins and the formation of eicosanoid precursors in patients with mild essential hypertension. *Journal of Human Hypertension*. 1990;4(3):227-33.
57. Puska P, Iacono JM, Nissinen A, et al. Dietary fat and blood pressure: an intervention study on the effects of a low-fat diet with two levels of polyunsaturated fat. *Preventive medicine*. 1985 Sep;14(5):573-84. PubMed PMID: 4070190. Epub 1985/09/01. eng.
58. Kuusi T, Ehnholm C, Huttunen JK, et al. Concentration and composition of serum lipoproteins during a low-fat diet at two levels of polyunsaturated fat. *J Lipid Res*. 1985 Mar;26(3):360-7. PubMed PMID: 3989392. Epub 1985/03/01. eng.
59. Nissinen A, Pietinen P, Tuomilehto J, Vartiainen E, Iacono JM, Puska P. Predictors of blood pressure change in a series of controlled dietary intervention studies. *J Hum Hypertens*. 1987 Dec;1(3):167-73. PubMed PMID: 3333530. Epub 1987/12/01. eng.
60. Armstrong RA, Chardigny JM, Beaufrère B, et al. No Effect of Dietary Trans Isomers of  $\alpha$ -linolenic Acid on Platelet Aggregation and Haemostatic Factors in European Healthy Men: The TRANSLinE Study. *Thrombosis Research*. 2000;100(3):133-41.
61. Fischer K, Colombani PC, Langhans W, Wenk C. Dietary trans  $\alpha$ -linolenic acid from deodorised rapeseed oil and plasma lipids and lipoproteins in healthy men: The TransLinE study. *British Journal of Nutrition*. 2001;85(3):387-92.

62. Sébédio JL, Vermunt S, Chardigny JM, et al. The effect of dietary trans  $\alpha$ -linolenic acid on plasma lipids and platelet fatty acid composition: The TransLinE study. *European Journal of Clinical Nutrition*. 2000;54(2):104-13.
63. Han SN, Leka LS, Lichtenstein AH, Ausman LM, Schaefer EJ, Meydani SN. Effect of hydrogenated and saturated, relative to polyunsaturated, fat on immune and inflammatory responses of adults with moderate hypercholesterolemia. *Journal of Lipid Research*. 2002;43(3):445-52.
64. Baer DJ, Judd JT, Clevidence BA, Tracy RP. Dietary fatty acids affect plasma markers of inflammation in healthy men fed controlled diets: A randomized crossover study. *American Journal of Clinical Nutrition*. 2004;79(6):969-73.
65. Judd JT, Baer DJ, Clevidence BA, Kris-Etherton P, Muesing RA, Iwane M. Dietary cis and trans monounsaturated and saturated FA and plasma lipids and lipoproteins in men. *Lipids*. 2002 Feb;37(2):123-31. PubMed PMID: 11908904.
66. Gebauer SK, Tracy RP, Baer DJ. Impact of stearic acid and oleic acid on hemostatic factors in the context of controlled diets consumed by healthy men. *Eur J Clin Nutr*. 2014 Sep;68(9):1072-4. PubMed PMID: 24736679. Pubmed Central PMCID: Pmc4155798. Epub 2014/04/17. eng.
67. Dyerberg J, Eskesen DC, Andersen PW, et al. Effects of trans- and n-3 unsaturated fatty acids on cardiovascular risk markers in healthy males. An 8 weeks dietary intervention study. *European Journal of Clinical Nutrition*. 2004;58(7):1062-70.
68. Sanders TAB, Oakley FR, Miller GJ, Mitropoulos KA, Crook D, Oliver MF. Influence of n-6 versus n-3 polyunsaturated fatty acids in diets low in saturated fatty acids on plasma lipoproteins and hemostatic factors. *Arteriosclerosis, Thrombosis, and Vascular Biology*. 1997;17(12):3449-60.
69. Jebb SA, Lovegrove JA, Griffin BA, et al. Effect of changing the amount and type of fat and carbohydrate on insulin sensitivity and cardiovascular risk: The RISCK (Reading, Imperial, Surrey, Cambridge, and Kings) trial. *American Journal of Clinical Nutrition*. 2010;92(4):748-58.
70. Gustafsson IB, Vessby B, Karlstrom B, Boberg J, Boberg M, Lithell H. Effects on the serum lipoprotein concentrations by lipid-lowering diets with different fatty acid compositions. *Journal of the American College of Nutrition*. 1985;4(2):241-8. PubMed PMID: 4019944. Epub 1985/01/01. eng.
71. Erkkilä AT, Schwab US, Lehto S, et al. Effect of fatty and lean fish intake on lipoprotein subclasses in subjects with coronary heart disease: A controlled trial. *Journal of Clinical Lipidology*. 2014;8(1):126-33.
72. Kondo K, Morino K, Nishio Y, et al. A fish-based diet intervention improves endothelial function in postmenopausal women with type 2 diabetes mellitus: A randomized crossover trial. *Metabolism: Clinical and Experimental*. 2014;63(7):930-40.
73. Lindqvist H, Langkilde AM, Undeland I, Rådendal T, Sandberg AS. Herring (*Clupea harengus*) supplemented diet influences risk factors for CVD in overweight subjects. *European Journal of Clinical Nutrition*. 2007;61(9):1106-13.
74. Williams CM, Francis-Knapper JA, Webb D, et al. Cholesterol reduction using manufactured foods high in monounsaturated fatty acids: a randomized crossover study. *Br J Nutr*. 1999 Jun;81(6):439-46. PubMed PMID: 10615219. Epub 2000/01/01. eng.
75. Lithander FE, Keogh GF, Wang Y, et al. No evidence of an effect of alterations in dietary fatty acids on fasting adiponectin over 3 weeks. *Obesity (Silver Spring, Md)*. 2008 Mar;16(3):592-9. PubMed PMID: 18239552. Epub 2008/02/02. eng.
76. McLaughlin T, Carter S, Lamendola C, et al. Effects of moderate variations in macronutrient composition on weight loss and reduction in cardiovascular disease risk in obese, insulin-resistant

- adults. *The American journal of clinical nutrition*. 2006 Oct;84(4):813-21. PubMed PMID: 17023708. Epub 2006/10/07. eng.
77. Muzio F, Mondazzi L, Harris WS, Sommariva D, Branchi A. Effects of moderate variations in the macronutrient content of the diet on cardiovascular disease risk factors in obese patients with the metabolic syndrome. *The American journal of clinical nutrition*. 2007 Oct;86(4):946-51. PubMed PMID: 17921369. Epub 2007/10/09. eng.
78. Raff M, Tholstrup T, Basu S, Nonboe P, Sorensen MT, Straarup EM. A diet rich in conjugated linoleic acid and butter increases lipid peroxidation but does not affect atherosclerotic, inflammatory, or diabetic risk markers in healthy young men. *The Journal of nutrition*. 2008 Mar;138(3):509-14. PubMed PMID: 18287358. Epub 2008/02/22. eng.
79. Raff M, Tholstrup T, Sejrsen K, Straarup EM, Wiinberg N. Diets rich in conjugated linoleic acid and vaccenic acid have no effect on blood pressure and isobaric arterial elasticity in healthy young men. *Journal of Nutrition*. 2006;136(4):992-7.
80. Rivellese AA, Auletta P, Marotta G, et al. Long term metabolic effects of two dietary methods of treating hyperlipidaemia. *BMJ (Clinical research ed)*. 1994 Jan 22;308(6923):227-31. PubMed PMID: 8111257. Pubmed Central PMCID: Pmc2539301. Epub 1994/01/22. eng.
81. Perez-Martinez P, Moreno-Conde M, Cruz-Teno C, et al. Dietary fat differentially influences regulatory endothelial function during the postprandial state in patients with metabolic syndrome: From the LIPGENE study. *Atherosclerosis*. 2010;209(2):533-8.
82. Tierney AC, McMonagle J, Shaw DI, et al. Effects of dietary fat modification on insulin sensitivity and on other risk factors of the metabolic syndrome-LIPGENE: A European randomized dietary intervention study. *International Journal of Obesity*. 2011;35(6):800-9.
83. Petersson H, Risérus U, McMonagle J, et al. Effects of dietary fat modification on oxidative stress and inflammatory markers in the LIPGENE study. *British Journal of Nutrition*. 2010;104(9):1357-62.
84. Gulseth HL, Gjelstad IMF, Tierney AC, et al. Dietary fat modifications and blood pressure in subjects with the metabolic syndrome in the LIPGENE dietary intervention study. *British Journal of Nutrition*. 2010;104(2):160-3.
85. Paniagua JA, Pérez-Martinez P, Gjelstad IMF, et al. A low-fat high-carbohydrate diet supplemented with long-chain n-3 PUFA reduces the risk of the metabolic syndrome. *Atherosclerosis*. 2011;218(2):443-50.
86. Jans A, Van Hees AMJ, Gjelstad IMF, et al. Impact of dietary fat quantity and quality on skeletal muscle fatty acid metabolism in subjects with the metabolic syndrome. *Metabolism: Clinical and Experimental*. 2012;61(11):1554-65.
87. Peña-Orihuela P, Camargo A, Rangel-Zuñiga OA, et al. Antioxidant system response is modified by dietary fat in adipose tissue of metabolic syndrome patients. *Journal of Nutritional Biochemistry*. 2013;24(10):1717-23.
88. Rangel-Zuñiga OA, Camargo A, Marin C, et al. Proteome from patients with metabolic syndrome is regulated by quantity and quality of dietary lipids. *BMC Genomics*. 2015;16(1).
89. Rasmussen BM, Vessby B, Uusitupa M, et al. Effects of dietary saturated, monounsaturated, and n-3 fatty acids on blood pressure in healthy subjects. *American Journal of Clinical Nutrition*. 2006;83(2):221-6.
90. Zhao G, Etherton TD, Martin KR, West SG, Gillies PJ, Kris-Etherton PM. Dietary  $\alpha$ -linolenic acid reduces inflammatory and lipid cardiovascular risk factors in hypercholesterolemic men and women. *Journal of Nutrition*. 2004;134(11):2991-7.

91. Zhao G, Etherton TD, Martin KR, Gillies PJ, West SG, Kris-Etherton PM. Dietary  $\alpha$ -linolenic acid inhibits proinflammatory cytokine production by peripheral blood mononuclear cells in hypercholesterolemic subjects. *American Journal of Clinical Nutrition*. 2007;85(2):385-91.
92. Nigam P, Bhatt S, Misra A, et al. Effect of a 6-month intervention with cooking oils containing a high concentration of monounsaturated fatty acids (olive and canola oils) compared with control oil in male Asian Indians with nonalcoholic fatty liver disease. *Diabetes technology & therapeutics*. 2014 Apr;16(4):255-61. PubMed PMID: 24625239. Epub 2014/03/15. eng.
93. Griffin MD, Sanders TAB, Davies IG, et al. Effects of altering the ratio of dietary n-6 to n-3 fatty acids on insulin sensitivity, lipoprotein size, and postprandial lipemia in men and postmenopausal women aged 45-70 y: The OPTILIP study. *American Journal of Clinical Nutrition*. 2006;84(6):1290-8.
94. Insull Jr W, Silvers A, Hicks L, Probstfield JL. Plasma lipid effects of three common vegetable oils in reduced-fat diets of free-living adults. *American Journal of Clinical Nutrition*. 1994;60(2):195-202.
95. Annuzzi G, Bozzetto L, Costabile G, et al. Diets naturally rich in polyphenols improve fasting and postprandial dyslipidemia and reduce oxidative stress: a randomized controlled trial. *American Journal of Clinical Nutrition*. 2014;99(3):463-71. PubMed PMID: 2012485141. Language: English. Entry Date: 20140307. Revision Date: 20140912. Publication Type: journal article.
96. de Roos NM, Bots ML, Katan MB. Replacement of dietary saturated fatty acids by trans fatty acids lowers serum HDL cholesterol and impairs endothelial function in healthy men and women. *Arterioscler Thromb Vasc Biol*. 2001 Jul;21(7):1233-7. PubMed PMID: 11451757.
97. De Roos NM, Schouten EG, Scheek LM, Van Tol A, Katan MB. Replacement of dietary saturated fat with trans fat reduces serum paraoxonase activity in healthy men and women. *Metabolism: Clinical and Experimental*. 2002;51(12):1534-7.
98. Jenkins DJA, Chiavaroli L, Wong JMW, et al. Adding monounsaturated fatty acids to a dietary portfolio of cholesterol-lowering foods in hypercholesterolemia. *CMAJ*. 2010;182(18):1961-7.
99. Foley M, Ball M, Chisholm A, Duncan A, Spears G, Mann J. Should mono- or poly-unsaturated fats replace saturated fat in the diet? *Eur J Clin Nutr*. 1992 Jun;46(6):429-36. PubMed PMID: 1639051. Epub 1992/06/01. eng.
100. De Mello VDF, Erkkilä AT, Schwab US, et al. The effect of fatty or lean fish intake on inflammatory gene expression in peripheral blood mononuclear cells of patients with coronary heart disease. *European Journal of Nutrition*. 2009;48(8):447-55.
101. Fuentes F, López-Miranda J, Pérez-Martínez P, et al. Chronic effects of a high-fat diet enriched with virgin olive oil and a low-fat diet enriched with  $\alpha$ -linolenic acid on postprandial endothelial function in healthy men. *British Journal of Nutrition*. 2008;100(1):159-65.
102. Fuentes F, López-Miranda J, Sánchez E, et al. Mediterranean and low-fat diets improve endothelial function in hypercholesterolemic men. *Annals of Internal Medicine*. 2001;134(12):1115-9+I-32.
103. Vázquez C, Botella-Carretero JI, Corella D, et al. White fish reduces cardiovascular risk factors in patients with metabolic syndrome: The WISH-CARE study, a multicenter randomized clinical trial. *Nutrition, Metabolism and Cardiovascular Diseases*. 2014;24(3):328-35.
104. Houtsmuller AJ, van Hal-Ferwerda J, Zahn KJ, Henkes HE. Favorable influences of linoleic acid on the progression of diabetic micro- and macroangiopathy in adult onset diabetes mellitus. *Prog Lipid Res*. 1981;20:377-86. PubMed PMID: 7342100.
105. Borchgrevink CF, Skaga E, Berg KJ, Skjaeggstad O. Absence of prophylactic effect of linolenic acid in patients with coronary heart-disease. *Lancet*. 1966 Jul 23;2(7456):187-9. PubMed PMID: 4161161. Epub 1966/07/23. eng.

106. Ashton EL, Best JD, Ball MJ. Effects of monounsaturated enriched sunflower oil on CHD risk factors including LDL size and copper-induced LDL oxidation. *Journal of the American College of Nutrition*. 2001;20(4):320-6.
107. Teng KT, Voon PT, Cheng HM, Nesaretnam K. Effects of partially hydrogenated, semi-saturated, and high oleate vegetable oils on inflammatory markers and lipids. *Lipids*. 2010 May;45(5):385-92. PubMed PMID: 20437207. Epub 2010/05/04. eng.
108. Christiansen E, Schnider S, Palmvig B, Tauber-Lassen E, Pedersen O. Intake of a diet high in trans monounsaturated fatty acids or saturated fatty acids: Effects on postprandial insulinemia and glycemia in obese patients with NIDDM. *Diabetes care*. 1997;20(5):881-7.
109. Ramsden CE, Hibbeln JR, Majchrzak SF, Davis JM. n-6 fatty acid-specific and mixed polyunsaturate dietary interventions have different effects on CHD risk: a meta-analysis of randomised controlled trials. *Br J Nutr*. 2010 Dec;104(11):1586-600. PubMed PMID: 21118617.
110. Woodhill JM, Palmer, A.J., and Blacket, R.B. Dietary habits and their modification in a coronary prevention programme for Australians. *Food Technology in Australia*. 1969 June 1969;21:264-71.
111. Woodhill JM, Leelarthapin, B., Blacket, R.B., and Palmer, A.J. Efficacy of weight reduction and carbohydrate restriction in moderate type 4 hyperlipidaemia. *Cardiac society of Australia and New Zealand*. 1975 October 1975;5(5):488.
112. Woodhill JM, Bernstein L. Lowering serum cholesterol levels by dietary modification. A change in food habits, not a special diet. *Med J Aust*. 1973 May 19;1(20):973-9. PubMed PMID: 4716585. Epub 1973/05/19. eng.
113. Woodhill JM, Palmer AJ, Leelarthapin B, McGilchrist C, Blacket RB. Low fat, low cholesterol diet in secondary prevention of coronary heart disease. *Adv Exp Med Biol*. 1978;109:317-30. PubMed PMID: 727035. Epub 1978/01/01. eng.
114. Rose GA, Thomson WB, Williams RT. Corn Oil in Treatment of Ischaemic Heart Disease. *Br Med J*. 1965 Jun 12;1(5449):1531-3. PubMed PMID: 14288105. Pubmed Central PMCID: 2166702. Epub 1965/06/12. eng.
115. Dayton S, Pearce ML. Trial of unsaturated-fat diet. *Lancet*. 1968 Dec 14;2(7581):1296-7. PubMed PMID: 4177491. Epub 1968/12/14. eng.
116. Dayton S, Pearce ML. Diet high in unsaturated fat. A controlled clinical trial. *Minn Med*. 1969 Aug;52(8):1237-42. PubMed PMID: 4896402. Epub 1969/08/01. eng.
117. Dayton S, Pearce ML. Prevention of coronary heart disease and other complications of arteriosclerosis by modified diet. *Am J Med*. 1969 May;46(5):751-62. PubMed PMID: 4892340. Epub 1969/05/01. eng.
118. Dayton S, Pearce ML. Diet and atherosclerosis. *Lancet*. 1970 Feb 28;1(7644):473-4. PubMed PMID: 4189785. Epub 1970/02/28. eng.
119. Dayton S, Pearce ML, Goldman H, et al. Controlled trial of a diet high in unsaturated fat for prevention of atherosclerotic complications. *Lancet*. 1968 Nov 16;2(7577):1060-2. PubMed PMID: 4176868. Epub 1968/11/16. eng.
120. Dayton S, Pearce ML, Hashimoto S, Fakler LJ, Hiscock E, Dixon WJ. A controlled clinical trial of a diet high in unsaturated fat. Preliminary observations. *N Engl J Med*. 1962 May 17;266:1017-23. PubMed PMID: 13884081. Epub 1962/05/17. eng.
121. Hiscock E, Dayton S, Pearce ML, Hashimoto S. A palatable diet high in unsaturated fat. *J Am Diet Assoc*. 1962 May;40:427-31. PubMed PMID: 13907771. Epub 1962/05/01. eng.
122. Pearce ML, Dayton S. Incidence of cancer in men on a diet high in polyunsaturated fat. *Lancet*. 1971 Mar 6;1(7697):464-7. PubMed PMID: 4100347. Epub 1971/03/06. eng.

123. Medical Research Council. Controlled trial of soya-bean oil in myocardial infarction. *Lancet*. 1968 Sep 28;2(7570):693-9. PubMed PMID: 4175085. Epub 1968/09/28. eng.
124. Clarke JAC, Hedley E, Marr JW, Wood JMH. Dietary Aspects of a Controlled Trial of Soya-bean Oil in Myocardial Infarction. *International Journal of Food Sciences and Nutrition*. 1969;23(3):136-50.
125. Leren P. The effect of plasma cholesterol lowering diet in male survivors of myocardial infarction. A controlled clinical trial. *Acta Med Scand Suppl*. 1966;466:1-92. PubMed PMID: 5228820. Epub 1966/01/01. eng.
126. Leren P. Effect of Plasma-Cholesterol-Lowering Diet in Male Survivors of Myocardial Infarction - a Controlled Clinical Trial. *B New York Acad Med*. 1968;44(8):1012-20. PubMed PMID: ISI:A1968B567000008. English.
127. Leren P. The Oslo diet-heart study. Eleven-year report. *Circulation*. 1970 Nov;42(5):935-42. PubMed PMID: 5477261.
128. Watts GF, Jackson P, Burke V, Lewis B. Dietary fatty acids and progression of coronary artery disease in men. *The American journal of clinical nutrition*. 1996 Aug;64(2):202-9. PubMed PMID: 8694021. Epub 1996/08/01. eng.
129. Watts GF, Jackson P, Mandalia S, et al. Nutrient intake and progression of coronary artery disease. *The American journal of cardiology*. 1994 Feb 15;73(5):328-32. PubMed PMID: 8109545. Epub 1994/02/15. eng.
130. Watts GF, Lewis B, Brunt JN, et al. Effects on coronary artery disease of lipid-lowering diet, or diet plus cholestyramine, in the St Thomas' Atherosclerosis Regression Study (STARS). *Lancet*. 1992 Mar 7;339(8793):563-9. PubMed PMID: 1347091. Epub 1992/03/07. eng.
131. Burr ML. Reflections on the Diet and Reinfarction Trial (DART). *Eur Heart J*. 2001;3(Supplement D):D75-D8.
132. Burr ML, Fehily AM. Fish and the Heart - Reply. *Lancet*. 1989 Dec 16;2(8677):1451-2. PubMed PMID: ISI:A1989CD88100023. English.
133. Burr ML, Fehily AM. Fatty fish and heart disease: a randomized controlled trial. *World Rev Nutr Diet*. 1991;66:306-12. PubMed PMID: 1647084. Epub 1991/01/01. eng.
134. Burr ML, Fehily AM, Gilbert JF, et al. Effects of changes in fat, fish, and fibre intakes on death and myocardial reinfarction: diet and reinfarction trial (DART). *Lancet*. 1989 Sep 30;2(8666):757-61. PubMed PMID: 2571009. Epub 1989/09/30. eng.
135. Burr ML, Fehily AM, Rogers S, Welsby E, King S, Sandham S. Diet and reinfarction trial (DART): design, recruitment, and compliance. *Eur Heart J*. 1989 Jun;10(6):558-67. PubMed PMID: 2547617. Epub 1989/06/01. eng.
136. Fehily AM, Vaughan-Williams, E., Shiels, K., Williams, A.H., Horner, M., Bingham, G., Holliday, R.M, Sweetnam, P.M. and Burr, M.L. Factors influencing compliance with dietary advice: the Diet and Reinfarction Trial (DART). *Journal of Human Nutrition and Dietetics*. 1991;4:33-42.
137. Halperin M, Cornfield J, Mitchell SC. Effect of diet on coronary-heart-disease mortality. *Lancet*. 1973 Aug 25;2(7826):438-9. PubMed PMID: 4124909.
