# Supplementary material for: Re-evaluation of the traditional diet-heart hypothesis: analysis of recovered data from Minnesota Coronary Experiment (1968-73)
Source: PubMed Central journal article supplement — BMJ. 2016 Apr 12;353:i1246. doi: 10.1136/bmj.i1246 (PMC4836695; doi:10.1136/bmj.i1246), 2016-04-12
Supplement: ramc027623.ww2_default.pdf [file ramc027623.ww2_default.pdf]

**Supplementary material [posted as supplied by author]**

**Appendix 2**

Original MCE data collection forms

# Data collection forms for the Minnesota Coronary Experiment

| MINNESOTA<br>CORONARY SURVEY<br>FORM 01 |          | ADMISSION TO STUDY |   |  |                                         | Tech Signature |
|-----------------------------------------|----------|--------------------|---|--|-----------------------------------------|----------------|
| COLS.                                   | CODE     |                    |   |  | ITEM                                    |                |
| 1-6                                     |          |                    |   |  | Hospital and Number                     |                |
| 7-15                                    |          |                    |   |  | Last Name                               |                |
| 16-22                                   |          |                    |   |  | First Name                              |                |
| 23                                      |          |                    |   |  | Middle Initial                          |                |
| 24-26                                   |          |                    |   |  | Hospital Address                        |                |
| 27                                      |          |                    |   |  | Sex    1-Male    2-Female               |                |
| 28-33                                   |          |                    |   |  | Birthdate (mo. day yr.)                 |                |
| 34-39                                   |          |                    |   |  | Date Admitted to Hospital (mo. day yr.) |                |
| 40-45                                   |          |                    |   |  | Date Blood Drawn (mo. day yr.)          |                |
| 46-50                                   |          |                    |   |  | Serum Number                            |                |
| 51-53                                   |          |                    |   |  | Serum Location (Tray Number)            |                |
| 54-59                                   |          |                    |   |  | Date ECG Recorded (mo. day yr.)         |                |
| 60-62                                   |          |                    |   |  | ECG Tape Number                         |                |
| 63-64                                   |          |                    |   |  | Height (To nearest inch)                |                |
| 65-67                                   |          |                    |   |  | Weight (To nearest pound)               |                |
| 68-73                                   | Systolic | Diastolic          |   |  | Blood Pressure (Left arm, mm Hg)        |                |
| 74                                      |          |                    |   |  | Arcus Senilis    1-Yes    2-No          |                |
| 75                                      |          |                    |   |  | Xanthelasma    1-Yes    2-No            |                |
| 76                                      |          |                    |   |  | Remarks    1-Yes    2-No                |                |
|                                         |          |                    |   |  | If Yes:                                 |                |
|                                         |          |                    |   |  |                                         |                |
|                                         |          |                    |   |  |                                         |                |
|                                         |          |                    |   |  |                                         |                |
| 78-80                                   | 0        | 1                  | 1 |  | Card Number                             |                |

Original to Data Center  
Copy to Project Clinic

MINNESOTA  
CORONARY SURVEY  
FORM 01

ADMISSION TO STUDY

Tech Signature

| COLS. | CODE  | ITEM                                                                                |
|-------|-------|-------------------------------------------------------------------------------------|
|       |       | Name                                                                                |
| 1-6   |       | Hospital and Number                                                                 |
| 7     |       | Previous Admission to any Minnesota State Mental Hospital<br>1-Yes<br>2-No          |
| 8-13  |       | If yes, last Hospital and Number                                                    |
| 14-19 |       | If yes, Date of Discharge (mo. day yr.)                                             |
| 20    |       | Pre-Hospital Residence<br>1-Urban 2-Small Town 3-Rural Non Farm<br>4-Farm 5-Unknown |
| 21    |       | Number of Heart Attacks                                                             |
| 22-23 |       | Year of Last Heart Attack                                                           |
| 24    |       | Number of Strokes                                                                   |
| 25-26 |       | Year of Last Stroke                                                                 |
| 27    |       | Diabetic 1-Yes 2-No                                                                 |
| 28    |       | If yes, Treatment 1-Insulin 2-Oral Agent<br>3-Diet 4-Unknown 5-None                 |
| 29    |       | Present Physical Activity<br>1-Sedentary 2-Moderate 3-Active                        |
|       |       | Present Smoking Habits                                                              |
| 30-31 |       | Cigars, Number Smoked Per Day 99-Unknown                                            |
| 32-33 |       | Pipe, Pipefuls Smoked Per Day 99-Unknown                                            |
| 34-35 |       | Cigarettes, Number Smoked Per Day 99-Unknown                                        |
|       |       | Past Cigarette Smoking Habits                                                       |
| 36    |       | Ever Smoked Cigarettes More Heavily in Past?<br>1-Yes 2-No 3-Unknown                |
| 37-38 |       | If yes, Maximum Number Smoked Per Day<br>99-Unknown                                 |
| 39-40 |       | Year in Which Present Smoking Pattern Began<br>99-Unknown                           |
| 72-77 |       | Location of Form in File                                                            |
| 78-80 | 0 1 2 | Card Number Verified By Date                                                        |

Original to Data Center  
Copy to Project Clinic

MINNESOTA  
CORONARY SURVEY  
FORM 02

ROUTINE FOLLOW-UP EXAMINATION

Tech Signature

| COLS. | CODE     |  |           |   |   |  | ITEM                                                                |
|-------|----------|--|-----------|---|---|--|---------------------------------------------------------------------|
|       |          |  |           |   |   |  | Name                                                                |
| 1-6   |          |  |           |   |   |  | Hospital and Number                                                 |
| 7-11  |          |  |           |   |   |  | Previous Hospital Number, If Above Changed                          |
| 12-14 |          |  |           |   |   |  | Hospital Address                                                    |
| 15-17 |          |  |           |   |   |  | Routine Follow-Up Examination Number                                |
| 18-23 |          |  |           |   |   |  | Date Blood Drawn (mo. day yr.)                                      |
| 24-28 |          |  |           |   |   |  | Serum Number                                                        |
| 29-31 |          |  |           |   |   |  | Serum Location (Tray Number)                                        |
| 32-37 |          |  |           |   |   |  | Date ECG Recorded (mo. day yr.)                                     |
| 39-40 |          |  |           |   |   |  | ECG Tape Number                                                     |
| 41-43 |          |  |           |   |   |  | Weight (to nearest pound)                                           |
| 44-49 | Systolic |  | Diastolic |   |   |  | Blood Pressure (Left arm, mm Hg)                                    |
| 50    |          |  |           |   |   |  | Diabetic 1-Yes 2-No                                                 |
| 51    |          |  |           |   |   |  | If yes, Treatment 1-Insulin 2-Oral Agent<br>3-Diet 4-Unknown 5-None |
| 52    |          |  |           |   |   |  | Present Physical Activity<br>1-Sedentary 2-Moderate 3-Active        |
|       |          |  |           |   |   |  | Present Smoking Habits                                              |
| 53-54 |          |  |           |   |   |  | Cigars, Number Smoked Per Day 99-Unknown                            |
| 55-56 |          |  |           |   |   |  | Pipe, Pipefuls Smoked Per Day 99-Unknown                            |
| 57-58 |          |  |           |   |   |  | Cigarettes, Number Smoked Per Day 99-Unknown                        |
| 59    |          |  |           |   |   |  | Remarks 1-Yes 2-No                                                  |
|       |          |  |           |   |   |  | If Yes:                                                             |
| 72-77 |          |  |           |   |   |  | Location of Form in File                                            |
| 78-79 |          |  |           | 0 | 2 |  | Form Number                                                         |
|       |          |  |           |   |   |  | Verified By                                                         |
|       |          |  |           |   |   |  | Date                                                                |

Original to Data Center  
Copy to Project Clinic

MINNESOTA  
CORONARY SURVEY  
Form 03

DAILY PATIENT MOVEMENT

Tech. Signature \_\_\_\_\_

DATE (Day Ending Midnight)

HOSPITAL \_\_\_\_\_

Col. 1 - 6

List all patient movement into, out of and within the hospital each day

| Previous Hosp & No | Present Hosp & No | Last Name, F. I. | Movement | New Hosp Address | Comments |
|--------------------|-------------------|------------------|----------|------------------|----------|
| 7-12               | 13-18             |                  | 19-20    | 21-23            |          |
| 25-30              | 31-36             |                  | 37-38    | 39-41            |          |
| 43-48              | 49-54             |                  | 55-56    | 57-59            |          |
| 61-66              | 67-72             |                  | 73-74    | 75-77            |          |
| 7-12               | 13-18             |                  | 19-20    | 21-23            |          |
| 25-30              | 31-36             |                  | 37-38    | 39-41            |          |
| 43-48              | 49-54             |                  | 55-56    | 57-59            |          |
| 61-66              | 67-72             |                  | 73-74    | 75-77            |          |

- |                                                       |                                                 |
|-------------------------------------------------------|-------------------------------------------------|
| 01 Admitted to hospital                               | 16 Returned from temporary medical transfer     |
| 02 Readmitted to hospital, yes Form 11                | 17 Transferred to sick bay                      |
| 03 Readmitted to hospital, no Form 11                 | 18 Transferred out of sick bay                  |
| 04 Final discharge from hospital                      | 19 Left for visit before breakfast              |
| 05 Provisional discharge from hospital                | 20 Left for visit after breakfast               |
| 06 Died in hospital                                   | 21 Left for visit after lunch                   |
| 07 Died on visit or discharge                         | 22 Left for visit after dinner                  |
| 08 Unauthorized absence from hospital                 | 23 Returned from visit before breakfast         |
| 09 Returned from unauthorized absence                 | 24 Returned from visit before lunch             |
| 10 Temporary medical transfer to Anoka                | 25 Returned from visit before dinner            |
| 11 Temporary medical transfer to Rochester            | 26 Returned from visit after dinner             |
| 12 Temporary medical transfer to General              | 27 Hospital address changed                     |
| 13 Temporary medical transfer to University           | 28 Missed breakfast                             |
| 14 Temporary medical transfer to Willmar Inebriate    | 29 Missed lunch                                 |
| 15 Temporary medical transfer to Moose Lake Inebriate | 30 Missed dinner                                |
|                                                       | 31 Temporary medical transfer to local hospital |

Col 78-79

Form Number

03

Edited by \_\_\_\_\_ Date \_\_\_\_\_

Original to Data Center

Copy for Project Center

Attending  
Physician

| Name  |      | CODE |                   |         |   | ITEM |                                                |
|-------|------|------|-------------------|---------|---|------|------------------------------------------------|
| COLS. |      |      |                   |         |   |      |                                                |
| 1-6   |      |      |                   |         |   |      | Hospital and Number                            |
| 7-12  |      |      |                   |         |   |      | Date of Death (mo. day yr.)                    |
|       | Yes  | No   | Question-<br>able | Unknown |   |      | Signs and Symptoms Prior to Death              |
| 13    | 1    | 2    | 3                 | 4       |   |      | Shock (Systolic Blood Pressure below 90 mm Hg) |
| 14    | 1    | 2    | 3                 | 4       |   |      | Rhythm Disturbance                             |
| 15    | 1    | 2    | 3                 | 4       |   |      | Chest Discomfort                               |
| 16    | 1    | 2    | 3                 | 4       |   |      | History of Angina Pectoris                     |
| 17    | 1    | 2    | 3                 | 4       |   |      | Acute Congestive Heart Failure                 |
| 18    | 1    | 2    | 3                 | 4       |   |      | Chronic Congestive Heart Failure               |
| 19    | 1    | 2    | 3                 | 4       |   |      | Convulsive Seizure                             |
| 20    | 1    | 2    | 3                 | 4       |   |      | Stertorous Breathing                           |
| 21    | 1    | 2    | 3                 | 4       |   |      | Facial Asymmetry                               |
| 22    | 1    | 2    | 3                 | 4       |   |      | Stiff Neck                                     |
| 23    | 1    | 2    | 3                 | 4       |   |      | Headache                                       |
| 24    | 1    | 2    | 3                 | 4       |   |      | Aphasia or Dysarthria                          |
| 25    | 1    | 2    | 3                 | 4       |   |      | Dysphagia                                      |
| 26    | 1    | 2    | 3                 | 4       |   |      | Flaccidity of or Inability to Move Limbs       |
| 27-30 | RArm | RLeg | LArm              | LLeg    |   |      | Circle Which Limbs                             |
| 31    | 1    | 2    | 3                 | 4       |   |      | Conjugate Deviation of Eyes                    |
| 32    |      |      |                   |         |   |      | Which Direction? 1-Right 2-Left                |
| 33    |      |      |                   |         |   |      | Duration of Acute Symptoms                     |
|       |      |      |                   |         |   |      | 1-Less than one hour 2-One to 24 hours         |
|       |      |      |                   |         |   |      | 3-More than 24 hours 4-Unknown                 |
| 34    | 1    | 2    |                   |         |   |      | Electrocardiogram Recorded?                    |
| 35    | 1    | 2    |                   |         |   |      | Blood Drawn for LDH Determination?             |
| 36    | 1    | 2    | 3                 | 4       |   |      | Clinical Diagnosis of Cause of Death           |
| 37    | 1    | 2    | 3                 | 4       |   |      | Acute Myocardial Infarction                    |
| 38    | 1    | 2    | 3                 | 4       |   |      | Cerebral Hemorrhage                            |
| 39-43 |      |      |                   |         |   |      | Cerebral Thrombosis                            |
| 44-59 |      |      |                   |         |   |      | Other:                                         |
|       |      |      |                   |         |   |      | Other Major Diagnoses                          |
| 60    | 1    | 2    |                   |         |   |      | Autopsy Performed?                             |
| 61-64 |      |      |                   |         |   |      | If yes, Autopsy No. By Whom?                   |
| 65    | 1    | 2    |                   |         |   |      | Heart and Aorta sent to University             |
| 66    | 1    | 2    |                   |         |   |      | Brain sent to University                       |
| 67-72 |      |      |                   |         |   |      | Location of Form in File                       |
| 78-79 |      |      |                   |         | 0 | 5    | Form Number Verified By Date                   |

Original to Data Center

Copy to Project Clinic

Name

Attending  
Physician

COLS.

CODE

ITEM

1-6

Hospital and Number

7-12

Date of Death (mo. day yr.)

Yes No Question-  
able Unknown

Signs and Symptoms Prior to Death

13

1

2

3

4

Shock (Systolic Blood Pressure below 90 mm Hg)

14

1

2

3

4

Rhythm Disturbance

15

1

2

3

4

Chest Discomfort

16

1

2

3

4

History of Angina Pectoris

17

1

2

3

4

Acute Congestive Heart Failure

18

1

2

3

4

Chronic Congestive Heart Failure

19

1

2

3

4

Convulsive Seizure

20

1

2

3

4

Stertorous Breathing

21

1

2

3

4

Facial Asymmetry

22

1

2

3

4

Stiff Neck

23

1

2

3

4

Headache

24

1

2

3

4

Aphasia or Dysarthria

25

1

2

3

4

Dysphagia

26

1

2

3

4

Flaccidity of or Inability to Move Limbs

27-30

RArm

RLeg

LArm

LLeg

Circle Which Limbs

31

1

2

3

4

Conjugate Deviation of Eyes

32

Which Direction? 1-Right 2-Left

33

Duration of Acute Symptoms

1-Less than one hour 2-One to 24 hours  
3-More than 24 hours 4-Unknown

34

1

2

Electrocardiogram Recorded?

35

1

2

Blood Drawn for LDH Determination?

36

1

2

3

4

Clinical Diagnosis of Cause of Death

37

1

2

3

4

Acute Myocardial Infarction

38

1

2

3

4

Cerebral Hemorrhage

39-43

Cerebral Thrombosis

44-59

Other:

Other Major Diagnoses

60

1

2

Autopsy Performed?

61-64

If yes, Autopsy No.

By Whom?

65

1

2

Heart and Aorta sent to University

66

1

2

Brain sent to University

67-72

Location of Form in File

78-79

0

5

Form Number

Verified By

Date

Name

Attending  
Physician

COLS.

CODE

ITEM

1-6

Hospital and Number

7-12

Date of Onset of Acute Illness

Yes No Question-  
able Unknown

Signs and Symptoms:

13

1 2 3 4

Shock (Systolic Blood Pressure below 90 mm Hg)

14

1 2 3 4

Rhythm Disturbance

15

1 2 3 4

Chest Discomfort

16

1 2 3 4

History of Angina Pectoris

17

1 2 3 4

Acute Congestive Heart Failure

18

1 2 3 4

Chronic Congestive Heart Failure

19

1 2 3 4

Convulsive Seizure

20

1 2 3 4

Stertorous Breathing

21

1 2 3 4

Facial Asymmetry

22

1 2 3 4

Stiff Neck

23

1 2 3 4

Headache

24

1 2 3 4

Aphasia or Dysarthria

25

1 2 3 4

Dysphagia

26

1 2 3 4

Flaccidity of or Inability to Move Limbs

27-30

1 RArm 2 RLeg 3 LArm 4 LLeg

Circle Which Limbs

31

1 2 3 4

Conjugate Deviation of Eyes

32

Which Direction? 1-Right 2-Left

33

1 2 3 4

Blood in Spinal Fluid?

34

1 2

Electrocardiogram Recorded? 1st, 3rd, 7th day

35

1 2

Blood Drawn for LDH Determination? 1, 2, 3, 4

Discharge Diagnosis:

36

1 2 3 4

Acute Myocardial Infarction

37

1 2 3 4

Cerebral Hemorrhage

38

1 2 3 4

Cerebral Thrombosis

39

1 2

Other, List:

40-70

71-76

Location of Form in File

78-79

0 6

Form Number

Edited By

Date





1-6 Hospital & No.

7-11 Last Name

12 First

13 M.I.

14-17 Autopsy No.

LEFT MAIN CORONARY

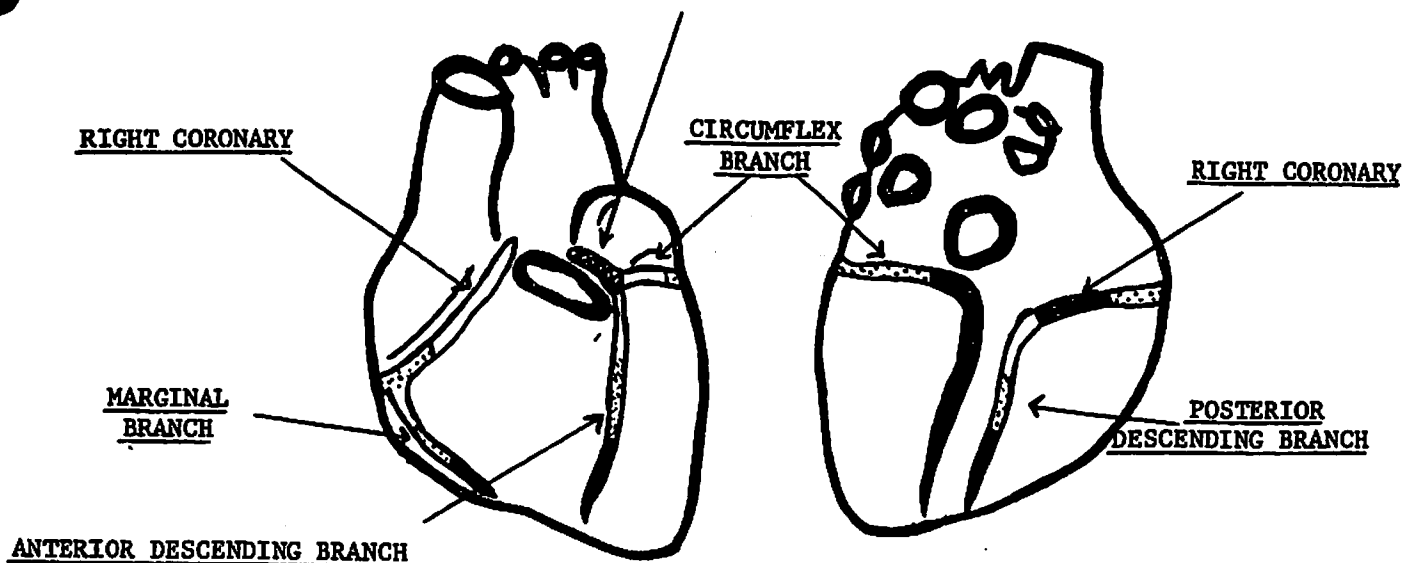

16 SEGMENTS SECTIONED FOR AREA OF GREATEST NARROWING

GRADE 1 - Less than 25% reduction in lumen size

GRADE 3 - 50% closure of lumen

GRADE 2 - 25% closure of lumen

GRADE 4 - 100% closure of lumen

GRADE 5 - 100% closure with thrombus

| ARTERY               | PROXIMAL        | MIDDLE          | DISTAL          |
|----------------------|-----------------|-----------------|-----------------|
| RIGHT CORONARY       | 18<br>1 2 3 4 5 | 19<br>1 2 3 4 5 | 20<br>1 2 3 4 5 |
| MARGINAL BRANCH      | 21<br>1 2 3 4 5 | 22<br>1 2 3 4 5 | 23<br>1 2 3 4 5 |
| POSTERIOR DESCENDING | 24<br>1 2 3 4 5 | 25<br>1 2 3 4 5 | 26<br>1 2 3 4 5 |
| ANTERIOR DESCENDING  | 27<br>1 2 3 4 5 | 28<br>1 2 3 4 5 | 29<br>1 2 3 4 5 |
| CIRCUMFLEX BRANCH    | 30<br>1 2 3 4 5 | 31<br>1 2 3 4 5 | 32<br>1 2 3 4 5 |
| LEFT MAIN CORONARY   | 33<br>1 2 3 4 5 |                 |                 |

Coronary Artery Preponderance:  1 Right  2 Left  3 Balanced

78-79

1 Right

2 Left

3 Balanced

Form and Card Number

Edited By

Date

MINNESOTA  
CORONARY SURVEY  
Form 09

CLASSIFICATION OF MYOCARDIAL INFARCTS

Pathologist

1-6 Hospital & No.

7-11 Last Name

12 First

13 M.I.

14-17 Autopsy No.

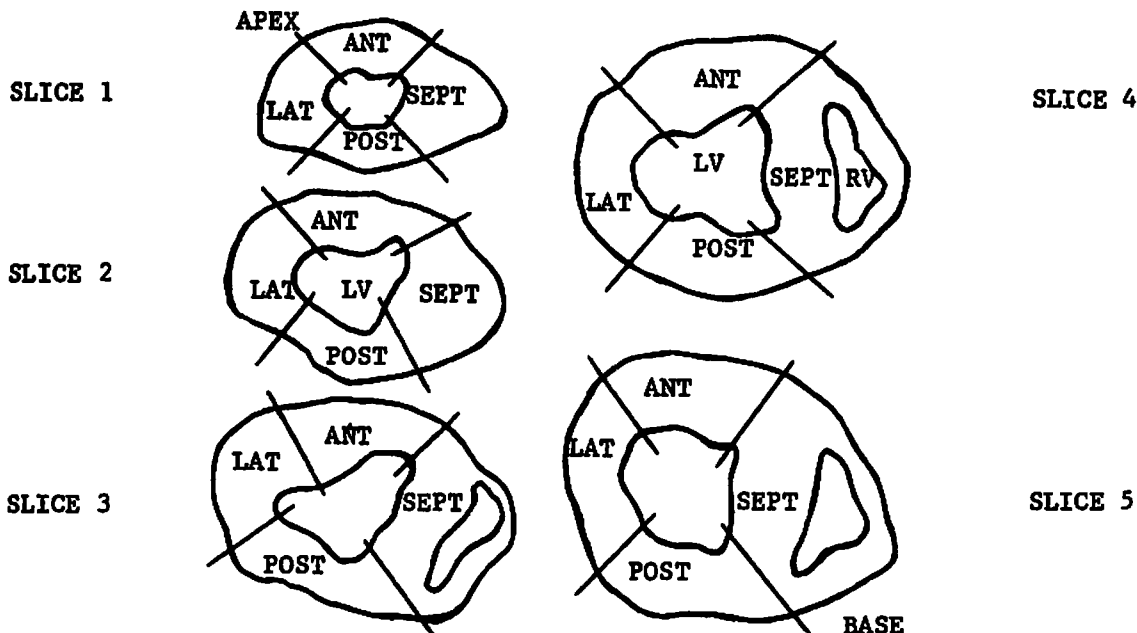

0-NO 1-YES 2-SEMI (Subendocardial Infarction)

|                       | ANTERIOR |   |   | LATERAL |    |   | POSTERIOR |   |    | SEPTAL |   |   |    |   |   |   |
|-----------------------|----------|---|---|---------|----|---|-----------|---|----|--------|---|---|----|---|---|---|
| ACUTE INFARCT         | 18       | 0 | 1 | 2       | 19 | 0 | 1         | 2 | 20 | 0      | 1 | 2 | 21 | 0 | 1 | 2 |
| HEALING INFARCT       | 22       | 0 | 1 | 2       | 23 | 0 | 1         | 2 | 24 | 0      | 1 | 2 | 25 | 0 | 1 | 2 |
| OLD INFARCT           | 26       | 0 | 1 | 2       | 27 | 0 | 1         | 2 | 28 | 0      | 1 | 2 | 29 | 0 | 1 | 2 |
| DIFFUSE FIBROSIS      | 30       | 0 | 1 | 2       | 31 | 0 | 1         | 2 | 32 | 0      | 1 | 2 | 33 | 0 | 1 | 2 |
| FIBROSIS & ANEURYSM   | 34       | 0 | 1 | 2       | 35 | 0 | 1         | 2 | 36 | 0      | 1 | 2 | 37 | 0 | 1 | 2 |
| TOTAL ACUTE INFARCTS  | 38       |   |   |         |    |   |           |   |    |        |   |   |    |   |   |   |
| TOTAL HEALED INFARCTS | 39       |   |   |         |    |   |           |   |    |        |   |   |    |   |   |   |

Form and Card Number

78-79

0 9

Edited By \_\_\_\_\_ Date \_\_\_\_\_

|                                         |                          |          |         |                   |
|-----------------------------------------|--------------------------|----------|---------|-------------------|
| MINNESOTA<br>CORONARY SURVEY<br>Form 10 | ATHEROSCLEROSIS OF AORTA |          |         | Pathologist       |
| 1-6 Hospital & No.                      | 7-11 Last Name           | 12 First | 12 M.I. | 14-17 Autopsy No. |

MODEL MATCHING PANEL  
FOR  
GRADING ATHEROSCLEROTIC LESIONS OF AORTA

|            |       |   |   |   |   |   |   |
|------------|-------|---|---|---|---|---|---|
|            | 18-19 |   |   |   |   |   |   |
| OBSERVER 1 | 1     | 2 | 3 | 4 | 5 | 6 | 7 |

|            |       |   |   |   |   |   |   |
|------------|-------|---|---|---|---|---|---|
|            | 20-21 |   |   |   |   |   |   |
| OBSERVER 2 | 1     | 2 | 3 | 4 | 5 | 6 | 7 |

|         |       |   |   |   |   |   |   |
|---------|-------|---|---|---|---|---|---|
|         | 22-23 |   |   |   |   |   |   |
| AVERAGE | 1     | 2 | 3 | 4 | 5 | 6 | 7 |

Form and Card Number 78-79

|   |   |
|---|---|
| 1 | 0 |
|---|---|

Edited By      Date

**MINNESOTA  
CORONARY SURVEY  
FORM 11**

**READMITTED TO STUDY**

Tech Signature

| COLS. | CODE     | ITEM                                       | DATE DISCHARGED                                   |
|-------|----------|--------------------------------------------|---------------------------------------------------|
|       |          | Name                                       |                                                   |
| 1-6   |          | Hospital and Number                        |                                                   |
| 7-11  |          | Previous Hospital Number, If Above Changed |                                                   |
| 12-14 |          | Hospital Address                           |                                                   |
| 15-20 |          | Date Readmitted to Hospital (mo. day yr.)  |                                                   |
| 21-26 |          | Date Blood Drawn (mo. day yr.)             |                                                   |
| 27-31 |          | Serum Number                               |                                                   |
| 32-34 |          | Serum Location (Tray Number)               |                                                   |
| 35-40 |          | Date ECG Recorded (mo. day yr.)            |                                                   |
| 41-43 |          | ECG Tape Number                            |                                                   |
| 44-46 |          | Weight (to nearest pound)                  |                                                   |
| 47-52 | Systolic | Diastolic                                  | Blood Pressure (left arm, mm Hg)                  |
| 53    |          | Diabetic                                   | 1-Yes 2-No                                        |
| 54    |          | If Yes, Treatment                          | 1-Insulin 2-Oral Agent<br>3-Diet 4-Unknown 5-None |
| 55    |          | Present Physical Activity                  | 1-Sedentary 2-Moderate 3-Active                   |
|       |          | Present Smoking Habits                     |                                                   |
| 56-57 |          | Cigars, Number Smoked Per Day              | 99-Unknown                                        |
| 58-59 |          | Pipe, Pipefuls Smoked Per Day              | 99-Unknown                                        |
| 60-61 |          | Cigarettes, Number Smoked Per Day          | 99-Unknown                                        |
| 62    |          | Remarks                                    | 1-Yes 2-No                                        |
|       |          | If Yes:                                    |                                                   |
| 72-77 |          | Location of Form in File                   |                                                   |
| 78-79 |          | Form Number                                | Edited By Date                                    |

Original to Data Center  
Copy to Project Clinic

| RIGHT SIDE                 | Atherosclerosis |   |   | Arteriosclerosis |    |   | Infarction |   |    | Hemorrhage |   |   |    |   |   |   |
|----------------------------|-----------------|---|---|------------------|----|---|------------|---|----|------------|---|---|----|---|---|---|
|                            | 11              | 0 | 1 | 2                | 12 | 0 | 1          | 2 | 13 | 0          | 1 | 2 | 14 | 0 | 1 | 2 |
| Anterior Cerebral Portion  | 15              | 0 | 1 | 2                | 16 | 0 | 1          | 2 | 17 | 0          | 1 | 2 | 18 | 0 | 1 | 2 |
| Middle Cerebral Portion    | 19              | 0 | 1 | 2                | 20 | 0 | 1          | 2 | 21 | 0          | 1 | 2 | 22 | 0 | 1 | 2 |
| Posterior Cerebral Portion | 23              | 0 | 1 | 2                | 24 | 0 | 1          | 2 | 25 | 0          | 1 | 2 | 26 | 0 | 1 | 2 |
| Basilar-Vertebral Portion  | 27              | 0 | 1 | 2                | 28 | 0 | 1          | 2 | 29 | 0          | 1 | 2 | 30 | 0 | 1 | 2 |
| Midbrain                   | 31              | 0 | 1 | 2                | 32 | 0 | 1          | 2 | 33 | 0          | 1 | 2 | 34 | 0 | 1 | 2 |
| Pons                       | 35              | 0 | 1 | 2                | 36 | 0 | 1          | 2 | 37 | 0          | 1 | 2 | 38 | 0 | 1 | 2 |
| Medulla                    | 39              | 0 | 1 | 2                | 40 | 0 | 1          | 2 | 41 | 0          | 1 | 2 | 42 | 0 | 1 | 2 |
| Cerebellum                 |                 |   |   |                  |    |   |            |   |    |            |   |   |    |   |   |   |
| LEFT SIDE                  |                 |   |   |                  |    |   |            |   |    |            |   |   |    |   |   |   |
| Anterior Cerebral Portion  | 43              | 0 | 1 | 2                | 44 | 0 | 1          | 2 | 45 | 0          | 1 | 2 | 46 | 0 | 1 | 2 |
| Middle Cerebral Portion    | 47              | 0 | 1 | 2                | 48 | 0 | 1          | 2 | 49 | 0          | 1 | 2 | 50 | 0 | 1 | 2 |
| Posterior Cerebral Portion | 51              | 0 | 1 | 2                | 52 | 0 | 1          | 2 | 53 | 0          | 1 | 2 | 54 | 0 | 1 | 2 |
| Basilar-Vertebral Portion  | 55              | 0 | 1 | 2                | 56 | 0 | 1          | 2 | 57 | 0          | 1 | 2 | 58 | 0 | 1 | 2 |
| Midbrain                   | 59              | 0 | 1 | 2                | 60 | 0 | 1          | 2 | 61 | 0          | 1 | 2 | 62 | 0 | 1 | 2 |
| Pons                       | 63              | 0 | 1 | 2                | 64 | 0 | 1          | 2 | 65 | 0          | 1 | 2 | 66 | 0 | 1 | 2 |
| Medulla                    | 67              | 0 | 1 | 2                | 68 | 0 | 1          | 2 | 69 | 0          | 1 | 2 | 70 | 0 | 1 | 2 |
| Cerebellum                 | 71              | 0 | 1 | 2                | 72 | 0 | 1          | 2 | 73 | 0          | 1 | 2 | 74 | 0 | 1 | 2 |

GRADE AND CODE

1. Atherosclerosis (extra parenchymal)

None = 0  
 <50% occlusion = 1  
 >50% occlusion = 2

2. Arteriosclerosis (parenchymal)

None = 0  
 Present but no occlusion = 1  
 Present with occlusion = 2

3. Infarction

None = 0  
 Microscopic = 1  
 Macroscopic = 2

4. Hemorrhage

None = 0  
 Microscopic = 1  
 Macroscopic = 2

78-79

Form and Card Number

|   |   |
|---|---|
| 1 | 2 |
|---|---|

Edited by \_\_\_\_\_ Date \_\_\_\_\_

MINNESOTA CORONARY SURVEY

CIRCLE OF WILLIS

Form 13  
1-6 Hospital No

Last Name

First

M.I.

7-10 Autopsy No

Pathologist

- 11 \_\_\_\_\_
- 12 \_\_\_\_\_
- 13 \_\_\_\_\_
- 14 \_\_\_\_\_
- 15 \_\_\_\_\_
- 16 \_\_\_\_\_
- 17 \_\_\_\_\_
- 18 \_\_\_\_\_
- 19 \_\_\_\_\_
- 20 \_\_\_\_\_
- 21 \_\_\_\_\_
- 22 \_\_\_\_\_
- 23 \_\_\_\_\_
- 24 \_\_\_\_\_
- 25 \_\_\_\_\_
- 26 \_\_\_\_\_
- 27 \_\_\_\_\_
- 28 \_\_\_\_\_
- 29 \_\_\_\_\_
- 30 \_\_\_\_\_
- 31 \_\_\_\_\_
- 32 \_\_\_\_\_
- 33-34 \_\_\_\_\_

Form and Card

78-79

|   |   |
|---|---|
| 1 | 3 |
|---|---|

Edited By \_\_\_\_\_ Date \_\_\_\_\_

LACTIC ACID DEHYDROGENASE DETERMINATIONS

Number

| NAME    | HOSPITAL AND NUMBER | DAY  | DATE DRAWN | DATE DONE | INTERNATIONAL UNITS |             | DAY   | DATE DRAWN | DATE DONE | INTERNATIONAL UNITS |             | FORM AND CARD NUMBER | COMMENTS |       |       |       |       |       |       |       |       |       |    |  |
|---------|---------------------|------|------------|-----------|---------------------|-------------|-------|------------|-----------|---------------------|-------------|----------------------|----------|-------|-------|-------|-------|-------|-------|-------|-------|-------|----|--|
|         |                     |      |            |           | TOTAL               | HEAT STABLE |       |            |           | TOTAL               | HEAT STABLE |                      |          |       |       |       |       |       |       |       |       |       |    |  |
| Col 1-6 | 7                   | 8-13 | 14-17      | 18-21     | 22-24               | 25          | 26-31 | 32-35      | 36-39     | 40-42               | 78-79       | 15                   |          |       |       |       |       |       |       |       |       |       |    |  |
|         |                     |      |            |           |                     |             |       |            |           |                     |             |                      | 43       | 44-49 | 50-53 | 54-57 | 58-60 | 61-66 | 67-70 | 71-74 | 75-77 | 78-79 | 15 |  |
|         |                     |      |            |           |                     |             |       |            |           |                     |             |                      |          |       |       |       |       |       |       |       |       |       |    |  |
|         | 7                   | 8-13 | 14-17      | 18-21     | 22-24               | 25          | 26-31 | 32-35      | 36-39     | 40-42               | 78-79       | 15                   |          |       |       |       |       |       |       |       |       |       |    |  |
|         |                     |      |            |           |                     |             |       |            |           |                     |             |                      | 43       | 44-49 | 50-53 | 54-57 | 58-60 | 61-66 | 67-70 | 71-74 | 75-77 | 78-79 | 15 |  |
|         |                     |      |            |           |                     |             |       |            |           |                     |             |                      |          |       |       |       |       |       |       |       |       |       |    |  |
|         | 7                   | 8-13 | 14-17      | 18-21     | 22-24               | 25          | 26-31 | 32-35      | 36-39     | 40-42               | 78-79       | 15                   |          |       |       |       |       |       |       |       |       |       |    |  |
|         |                     |      |            |           |                     |             |       |            |           |                     |             |                      | 43       | 44-49 | 50-53 | 54-57 | 58-60 | 61-66 | 67-70 | 71-74 | 75-77 | 78-79 | 15 |  |
|         |                     |      |            |           |                     |             |       |            |           |                     |             |                      |          |       |       |       |       |       |       |       |       |       |    |  |

Completed By \_\_\_\_\_ Date \_\_\_\_\_



| Hospital and No. | Electrocardiogram Classification |       |       |       |       |       |       |       |       | Date EKG Recorded |
|------------------|----------------------------------|-------|-------|-------|-------|-------|-------|-------|-------|-------------------|
|                  | 1                                | 2     | 3     | 4     | 5     | 6     | 7     | 8     | 9     |                   |
| COL. 1-6         | 8-10                             | 11-12 | 13-14 | 15-16 | 17-18 | 19-20 | 21-22 | 23-24 | 25-27 | 29-34             |
|                  |                                  |       |       |       |       |       |       |       |       |                   |
|                  |                                  |       |       |       |       |       |       |       |       |                   |
|                  |                                  |       |       |       |       |       |       |       |       |                   |
|                  |                                  |       |       |       |       |       |       |       |       |                   |
|                  |                                  |       |       |       |       |       |       |       |       |                   |
|                  |                                  |       |       |       |       |       |       |       |       |                   |

Location of Form in File

Cols. 72-77

Form and

Electrocardiogram Classification

Edited By: \_\_\_\_\_  
Date: \_\_\_\_\_

| 2     | 3     | 4     | 5     | 6     | 7     | 8     | 9     | Date EKG Recorded | Form No. | Repeat | Date un-acceptable EKG |
|-------|-------|-------|-------|-------|-------|-------|-------|-------------------|----------|--------|------------------------|
| 11-12 | 13-14 | 15-16 | 17-18 | 19-20 | 21-22 | 23-24 | 25-27 | 29-34             | 36-37    |        |                        |
|       |       |       |       |       |       |       |       |                   |          |        |                        |
|       |       |       |       |       |       |       |       |                   |          |        |                        |
|       |       |       |       |       |       |       |       |                   |          |        |                        |
|       |       |       |       |       |       |       |       |                   |          |        |                        |
|       |       |       |       |       |       |       |       |                   |          |        |                        |
|       |       |       |       |       |       |       |       |                   |          |        |                        |
|       |       |       |       |       |       |       |       |                   |          |        |                        |
|       |       |       |       |       |       |       |       |                   |          |        |                        |
|       |       |       |       |       |       |       |       |                   |          |        |                        |
|       |       |       |       |       |       |       |       |                   |          |        |                        |
|       |       |       |       |       |       |       |       |                   |          |        |                        |
|       |       |       |       |       |       |       |       |                   |          |        |                        |
|       |       |       |       |       |       |       |       |                   |          |        |                        |
|       |       |       |       |       |       |       |       |                   |          |        |                        |
|       |       |       |       |       |       |       |       |                   |          |        |                        |
|       |       |       |       |       |       |       |       |                   |          |        |                        |
|       |       |       |       |       |       |       |       |                   |          |        |                        |
|       |       |       |       |       |       |       |       |                   |          |        |                        |

Cols. 72-77

File

Form and Card Number

Cols. 78-79

1 6
